# 1 Pyridoxal Kinase Inhibition by Artemisinins

## 2 Downregulates Inhibitory Neurotransmission

3  
4  
5  
6 Vikram Babu Kasaragod<sup>1,4,5,\*</sup>, Anabel Pacios-Michelena<sup>1,4</sup>, Natascha Schaefer<sup>2</sup>, Fang Zheng<sup>3</sup>,  
7 Nicole Bader<sup>1</sup>, Christian Alzheimer<sup>3</sup>, Carmen Villmann<sup>2</sup> and Hermann Schindelin<sup>1,\*</sup>.

8  
9 <sup>1</sup>Institute of Structural Biology, Rudolf Virchow Center for Experimental Biomedicine, University of  
10 Würzburg, Josef-Schneider Str. 2, 97080 Würzburg, Germany.

11 <sup>2</sup>Institute for Clinical Neurobiology, University of Würzburg, Versbacherstr. 5, 97078 Würzburg,  
12 Germany.

13 <sup>3</sup>Institute of Physiology and Pathophysiology, Friedrich Alexander University Erlangen-Nürnberg  
14 Universitätsstr. 17, 91054 Erlangen, Germany.

15 <sup>4</sup>These authors contributed equally to this work.

16 <sup>5</sup>Present address: Neurobiology Division, MRC Laboratory of Molecular Biology, Francis Crick  
17 Avenue, Cambridge Biomedical Campus, Cambridge, CB2 0QH, United Kingdom.

18  
19  
20 **\*Correspondence:** [vkasaragod@mrc-lmb.cam.ac.uk](mailto:vkasaragod@mrc-lmb.cam.ac.uk) (V.B.K) and

21 [hermann.schindelin@virchow.uni-wuerzburg.de](mailto:hermann.schindelin@virchow.uni-wuerzburg.de) (H.S)

22  
23  
24 **KEYWORDS:** Artemisinin; Artesunate; Anti-malarial drugs; Pyridoxal kinase; Pyridoxal-phosphate  
25 (PLP); Vitamin B6; Neurotransmitter biosynthesis; Glutamic acid decarboxylase (GAD); Inhibitory  
26 neurotransmission.

27 **ABSTRACT**

28 The anti-malarial artemisinins have also been implicated in the regulation of various other cellular  
29 pathways. Despite their widespread application, the cellular specificities and molecular mechanisms  
30 of target recognition by artemisinins remain poorly characterized. We recently demonstrated how  
31 these drugs modulate inhibitory postsynaptic signaling by direct binding to the scaffolding protein  
32 gephyrin. Here, we report the crystal structure of the central metabolic enzyme pyridoxal kinase  
33 (PDXK), which catalyzes the production of the active form of vitamin-B6 (also known as pyridoxal 5'-  
34 phosphate, PLP), in complex with artesunate at 2.4-Å resolution. Partially overlapping binding of  
35 artemisinins with the substrate pyridoxal inhibits PLP biosynthesis as demonstrated by kinetic  
36 measurements. Electrophysiological recordings from hippocampal slices and activity measurements  
37 of glutamic acid decarboxylase (GAD), a PLP-dependent enzyme synthesizing the neurotransmitter  
38  $\gamma$ -aminobutyric acid (GABA), define how artemisinins interfere presynaptically with GABAergic  
39 signaling. Our data provide a comprehensive picture of artemisinin-induced effects on inhibitory  
40 signaling in the brain.

41

42

43

44

45

46

47

48

## 49 INTRODUCTION

50 Pyridoxal 5'-phosphate (PLP) is the active form of vitamin B6. In humans, PLP biosynthesis is  
51 catalyzed by pyridoxal kinase (PDXK), a member of the ribokinase superfamily. PDXK utilizes inactive  
52 forms of vitamin B6 (pyridoxal (PL), pyridoxine and pyridoxamine) and ATP as substrates, producing  
53 PLP along with the byproduct ADP. The corresponding reaction proceeds *via* a random substrate  
54 addition reaction mechanism (Li et al., 2004) in which PLP biosynthesis takes place by transferring  
55 the  $\gamma$ -phosphate of ATP to the 5'-OH group of the B6 vitamers, in a process assisted by divalent metal  
56 ions such as  $Zn^{2+}$  and  $Mg^{2+}$  (Neary and Diven, 1970) (**Figure 1A**). PLP serves as the essential active  
57 site component for more than 160 distinct human enzymatic activities (di Salvo et al., 2012) catalyzing  
58 crucial cellular processes such as detoxification reactions and multiple metabolic processes including  
59 amino acid, carbohydrate and lipid metabolism. PLP-dependent enzymes also participate in  
60 neurotransmitter biosynthesis including the inhibitory neurotransmitters  $\gamma$ -aminobutyric acid (GABA)  
61 and glycine (di Salvo et al., 2012; Eliot and Kirsch, 2004; Percudani and Peracchi, 2003), which are  
62 synthesized by glutamic acid decarboxylase (GAD) and serine hydroxymethyl transferase (SHMT),  
63 respectively. Vitamin B6 deficiency has been implicated in multiple neurological, psychiatric and  
64 internal disorders possibly including even diabetes, cancer and autism (Merigliano et al., 2018), thus  
65 underpinning the importance of a finely tuned PLP biosynthesis.

66 Recently, PDXK was identified as one of the mammalian targets of the anti-malarial drug artemisinin  
67 (Li et al., 2017). Artemisinin-containing plant extracts have been used in traditional Chinese medicine  
68 for the treatment of malaria (Tu, 2016). Chemically, these small molecules are sesquiterpene lactones  
69 with an unusual endo-peroxide bridge. Artemisinin and its semi-synthetic derivatives artemether and  
70 artesunate (collectively referred to as artemisinins), in combination with quinones such as mefloquine  
71 and lumefantrine, nowadays represent the standard drug combinations used to treat malaria caused  
72 by *Plasmodium falciparum* (WHO, 2015). In addition to their anti-protozoan activities, these drugs  
73 have also been pharmacologically observed to regulate the activities of a variety of mammalian  
74 cellular processes some of which are deregulated in various types of cancer (Crespo-Ortiz and Wei,  
75 2012; Gautam et al., 2009). Recently, it was discovered that artemisinins also modulate the

76 differentiation of pancreatic T $\alpha$  cells by inducing a trans-differentiation of glucagon-producing T $\alpha$  cells  
77 into insulin-secreting T $\beta$  cells, thus suggesting an anti-diabetic activity of artemisinins (Li et al., 2017).  
78 However, two subsequent studies contradicted this observation, thus questioning the potential clinical  
79 application of these compounds in the treatment of diabetes (Ackermann et al., 2018; van der Meulen  
80 et al., 2018).

81 Until recently, in the absence of a single protein crystal structure in complex with artemisinins (neither  
82 a plasmodial nor a mammalian protein), the detailed framework describing the target recognition by  
83 these small molecules remained enigmatic. The first molecular insights into artemisinin-recognition  
84 by a target protein were derived by us from crystal structures of the C-terminal domain of the  
85 moonlighting protein gephyrin (GephE) in complex with two artemisinin derivatives, artesunate and  
86 artemether (Kasaragod et al., 2019). Gephyrin is the principal scaffolding protein at inhibitory  
87 postsynaptic specializations and also catalyzes the final two steps of the evolutionarily conserved  
88 molybdenum cofactor (Moco) biosynthesis (Kasaragod and Schindelin, 2016, 2018; Kuper et al.,  
89 2004). Structures of the GephE-artemisinin complexes demonstrated that artemisinins specifically  
90 target the universal receptor binding pocket of this moonlighting protein, without altering its enzymatic  
91 activity, thus inhibiting critical interactions of gephyrin with GABA type A receptors (GABA $_A$ Rs) and  
92 glycine receptors (GlyRs). As an important functional consequence, artemisinins modulate inhibitory  
93 neurotransmission in a gephyrin-dependent manner. In addition to gephyrin, various proteins were  
94 identified as putative targets of artemisinins in pancreatic cells, including the central metabolic  
95 enzyme PDXK (Li et al., 2017), yet the molecular mechanisms underlying the modulation of these  
96 targets by artemisinins remained enigmatic.

97 Here, we determined the 2.4 Å resolution crystal structure of mouse pyridoxal kinase (mPDXK) in  
98 complex with artesunate, a succinate derivative of artemisinin. The artesunate binding site partially  
99 overlaps with the substrate (PL)/product (PLP) binding site, thus suggesting a drug-induced inhibitory  
100 effect. Enzymatic activity assays *in vitro* indeed revealed a significant inhibition of PLP production in  
101 the presence of artemisinins with K $_i$  values in the high micromolar range. Electrophysiological  
102 recordings and measurements of GABA biosynthesis suggests that artemisinins exert their effect by

103 down regulating the activity of PLP-dependent enzymes such as GAD. Taken together, our data  
104 define the molecular basis for the inhibition of PDXK by artemisinins and their consequences at the  
105 presynaptic terminals of inhibitory postsynapses and extend our current understanding of the  
106 artemisinin-induced modulation of inhibitory neurotransmission beyond gephyrin.

107

## 108 **RESULTS**

### 109 **Artemisinins Inhibit PDXK:**

110 To derive the oligomeric state of recombinantly purified mPDXK, we first performed multi-angle light  
111 scattering coupled to size exclusion chromatography (SEC-MALS) experiments. The experiments  
112 showed that the protein is a dimer in solution (**Figure 1 – figure supplement 1**), as has been reported  
113 for the human and also prokaryotic PDXK homologs (Kerry et al., 1986). Next, to check the activity of  
114 the recombinant enzyme, we measured its enzymatic activity by directly monitoring PLP production  
115 in a photometric assay. The characterization of the recombinantly purified protein showed a  $K_M$   
116  $26.0 \pm 5.4 \mu\text{M}$ , a  $V_{\text{max}}$  of  $0.1640 \pm 0.006 \mu\text{M/s}$  and a  $k_{\text{cat}}$  of  $0.1436 \pm 0.003 \text{ s}^{-1}$  for the substrate PL in  
117 the presence of 1 mM of ATP (**Figure 1B**), which is in line with reported  $K_M$  values (3-50  $\mu\text{M}$ ) for  
118 PDXK (Elsinghorst et al., 2015; Hanna et al., 1997; Jones et al., 2012; Kwok and Churchich, 1979;  
119 McCormick et al., 1961; Safo et al., 2006; Ubbink et al., 1990).

120 To understand the effect of artemisinins on the enzyme, we performed the activity assays in the  
121 presence of two artemisinins, the parental compound artemisinin and artesunate (**Figure 1C-D**,  
122 **Source data 1**). The determination of the turnover rates ( $V_{\text{el}}$ ) displayed a highly significant inhibition  
123 in mPDXK activity in the presence of artemisinins with observed reductions to  $0.032 \pm 0.001$  and  
124  $0.047 \pm 0.007 \text{ s}^{-1}$  for artemisinin and artesunate, respectively. Compared to the turnover rate of the  
125 enzyme in the absence of these drugs ( $0.116 \pm 0.01 \text{ s}^{-1}$ ) (**Figure 1E**) this corresponds to a ~3-fold  
126 decrease. The enzymatic or turnover velocity,  $V_{\text{el}}$ , is defined here as the mean number of product  
127 molecules generated by a single enzyme per unit time. Statistical analyses revealed a significant  
128 reduction in enzymatic activity in the presence of the artemisinins and via a Dixon plot analysis  $K_i$ -  
129 values of  $120 \pm 2.4$  and  $1250 \pm 4.7 \mu\text{M}$  were derived for artemisinin and artesunate, respectively

130 (Figure 1 – figure supplement 2, Source data 1). To further characterize the inhibitory properties  
131 of artemisinins we also determined the IC<sub>50</sub> for both compounds. While artesunate displayed an IC<sub>50</sub>-  
132 value of 1445 ± 1.4 μM, artemisinin was ~6-fold more potent with an IC<sub>50</sub> of 229 ± 1.3 μM (Figure  
133 1F).

134

### 135 **Structural Basis for the Inhibition of PDXK by Artemisinins:**

136 To gain insights into the mechanism of inhibition at the atomic level we determined three crystal  
137 structures of mPDXK. First, we derived the crystal structure of mPDXK in its apo-state and in complex  
138 with ATP<sub>γ</sub>S, one of the substrates of the enzyme. These structures were solved by molecular  
139 replacement (MR) with the structure of human PDXK in the absence of any substrate as search  
140 model. The apo and the mPDXK-ATP<sub>γ</sub>S structures were refined in space group C2 containing two  
141 dimers in the asymmetric unit to resolutions of 2.45 and 2.9 Å, respectively (Table 1, Figure 2 –  
142 figure supplement 1A-B). The overall architecture of mouse apo-PDXK shares high structural  
143 similarity with its human ortholog (Li et al., 2002; Musayev et al., 2007) as reflected in root mean  
144 square (rms) deviations of 0.84 Å (PDB: 2YXT; human apo-PDXK) after superposition of all C<sub>α</sub>-  
145 atoms.

146 Closer inspection of the nucleotide binding pocket revealed that ATP<sub>γ</sub>S-binding is directly mediated  
147 by Val226, which forms a hydrogen bond with the adenine of the nucleotide through its main chain  
148 carbonyl oxygen and residues Thr186 and Thr233 as well as Asp118, Asn150, which coordinate the  
149 ATP analog through interactions with the α and β-phosphate of its tri-phosphate moiety, respectively  
150 (Figure 2 – figure supplement 1C). There were no significant conformational changes in the binary  
151 complex compared to the mouse apo structure as reflected in an rms deviation of 0.45 Å for all C<sub>α</sub>-  
152 atoms with minimal structural rearrangements in ATP binding pocket (Figure 2 – figure supplement  
153 1D). Comparison of PDXK sequences derived from organisms representing different evolutionary  
154 levels revealed that all residues, which are crucial for the binding of the nucleotide, are strictly  
155 conserved (Figure 2 – figure supplement 2).

156 To gain insights into the mechanism of artemisinin inhibition we determined the crystal structure of  
157 mPD XK in complex with ATP $\gamma$ S and artesunate (Figure 2, Table 1). This structure was obtained by  
158 soaking artesunate into pre-existing binary mPD XK-ATP $\gamma$ S crystals. After molecular replacement with  
159 the apo structure, in addition to the clear density for ATP $\gamma$ S (Figure 2B), strong difference density in  
160 close proximity to the substrate-binding pocket was also observed (Figure 2D), which allowed us to  
161 unambiguously model the bound artesunate. Surprisingly, this density was observed in only one of  
162 the four molecules present in the asymmetric unit. The absence of artesunate in the other monomers  
163 may be due to the involvement of these protomers in crystal contacts, thus preventing artesunate-  
164 binding when soaking the compounds into pre-existing crystals.

165 The fact that all three structures reported here belong to the same space group with similar unit cell  
166 parameters and essentially identical crystal packing allowed for a meaningful comparative analysis.  
167 The overall architecture of the mPD XK-ATP $\gamma$ S-artesunate structure is identical to the apo and binary  
168 mPD XK-ATP $\gamma$ S structures; a superposition of the C $\alpha$  atoms of these two complexes revealed rms  
169 deviations of 0.51 and 0.30 Å for the apo and ATP $\gamma$ S-bound structures, respectively. Binding of the  
170 substrate analog ATP $\gamma$ S was mediated by the same residues described for the binary mPD XK-ATP $\gamma$ S  
171 complex (Figure 2C and Figure 2 – figure supplement 3). A closer inspection of the artesunate-  
172 binding pocket revealed that drug-binding is mainly mediated by Val41, Thr47 and also Trp52, which  
173 generate a hydrophobic pocket that binds artesunate binds with a buried surface area of 364 Å<sup>2</sup>  
174 compared to a total surface area of the drug of 538 Å<sup>2</sup>. In particular, artesunate is sandwiched in  
175 between two aromatic residues, Phe43 and Tyr84, which stabilize artesunate through van der Waals  
176 interactions. In addition to the hydrophobic interactions, the carboxylate moiety of artesunate comes  
177 into proximity of the guanidinium group in the side chain of Arg86, which potentially stabilizes the  
178 interactions through electrostatic contacts. Finally, Asp87 favors artesunate-binding through a  
179 hydrogen bond (2.5 Å) between its side chain and the carboxylate of the artesunate assuming one of  
180 these carboxylates is protonated (Figure 2E).

181 An analysis of the mPD XK-ATP $\gamma$ S-artesunate structure showed that the ATP binding pocket is in  
182 relatively close proximity from the bound artesunate at a distance of ~21 Å, as measured between

183 the C<sub>α</sub> atoms of Phe237 in the ATP binding pocket and Phe43 in the artesunate binding pocket. A  
184 comparison of the ternary mPDXK-ATP<sub>γ</sub>S-artesunate and binary mPDXK-ATP<sub>γ</sub>S structures revealed  
185 that binding of artesunate neither induced any significant rearrangements in the conformation of the  
186 nucleotide nor in the residues mediating its binding, in line with the independent binding of the two  
187 ligands (**Figure 2 – figure supplement 3 and 4**). Interestingly, the binding pocket of artesunate, like  
188 that of ATP as mentioned earlier, is highly conserved (**Figure 2 – figure supplement 5**). To get  
189 additional information regarding the mode of inhibition, we also compared our ternary structure with  
190 the PDXK-PLP structures. Strikingly, when we superimposed the already reported ternary *HsPDXK*-  
191 ATP-PLP (PDB: 3KEU) structure with our ternary complex, a critical partial overlap between the tri-  
192 cyclic ring system of artesunate and the pyridine ring of the product PLP was uncovered (**Figure 3A-**  
193 **B**) which would result in severe van der Waals repulsions for the C2 and C3 atoms of PLP and the  
194 C2 and C3 atoms of artesunate, if bound simultaneously. This clearly constitutes a major reason for  
195 the inhibition of the PDXK. Moreover, an analysis of the surface properties of the ternary structure  
196 revealed a tunnel, which is leading from the protein surface to the distal end of ATP-binding pocket  
197 spanning a length of ~38 Å, which is blocked near its entrance by artesunate. A blockade of this  
198 tunnel, in turn, may prevent an efficient turnover of the enzyme. Taken together, these data illustrate  
199 the structural basis for the inhibition of mPDXK by artemisinins (**Figure 3C-E**).

200

### 201 **Mapping of the Artemisinin Binding Pocket:**

202 To validate the observations derived from the crystal structures, we performed site directed  
203 mutagenesis experiments of residues located in the artesunate binding pocket (**Figure 3F**) and tested  
204 these mutants for PLP production in the presence and absence of artesunate (**Figure 3G-H, Source**  
205 **data 2**). First, we analyzed the mutants through SEC-MALS, which revealed that all variants retained  
206 their dimeric state in solution as observed for the wild-type (WT) protein (**Figure 3 – figure**  
207 **supplement 1**). Amongst the residues being investigated, we mutated Val41 and Phe43, which are  
208 involved in mediating the binding of artesunate through hydrophobic interactions to either introduce  
209 steric interference or alter the polar properties of the binding pocket, respectively. The V41W and



210 F43R mutants significantly lowered the turnover rates ( $0.04 \pm 0.006 \text{ s}^{-1}$  for V41W and  $0.016 \pm 0.001$   
211  $\text{s}^{-1}$  for F43R), even in the absence of artesunate in comparison to the WT ( $0.080 \pm 0.004 \text{ s}^{-1}$ ). This  
212 can be easily explained by the fact that these residues also mediate binding of PL and thus play a  
213 role in the regular enzymatic turnover of the protein. In contrast, mutation of Arg86, the residue  
214 involved in the long range electrostatic interaction with the carboxylate of artesunate to the bulky  
215 aromatic side chain of Trp did not alter the activity of mPDXK in the absence of artesunate, as  
216 demonstrated by its turnover rate of  $0.08 \pm 0.005 \text{ s}^{-1}$ , which is virtually identical to that of the WT  
217 **(Figure 3G)**.

218 Next, we further analyzed the catalytic activity of the mutants in the presence of artesunate **(Figure**  
219 **3H and Figure 3 – figure supplement 2)**. The V41W and F43R variants did not result in significant  
220 changes in the turnover rates of the enzyme in the presence of artesunate ( $0.044 \pm 0.009$  for V41W  
221 and  $0.014 \pm 0.005$  for F43R  $\text{s}^{-1}$  compared to  $0.040 \pm 0.006$  and  $0.016 \pm 0.001 \text{ s}^{-1}$ , respectively, in its  
222 absence), which is in line with artesunate binding being abolished in both variants **(Figure 3 – figure**  
223 **supplement 2C and D)**. As expected, a similar trend was observed in case of the V41W/F43R double  
224 mutant with turnover rates of  $0.024 \pm 0.002 \text{ s}^{-1}$  in the presence of artesunate compared to  $0.019 \pm$   
225  $0.004 \text{ s}^{-1}$  in its absence **(Figure 3 – figure supplement 2E)**. An identical behavior was observed in  
226 the case of GephE where mutation of a crucial aromatic residue (Phe330) to Ala completely abolished  
227 artemisinin binding (Kasaragod et al., 2019). In contrast, when we compared the activity of the R86W  
228 variant in the absence ( $0.080 \pm 0.005 \text{ s}^{-1}$ ) and presence ( $0.038 \pm 0.008 \text{ s}^{-1}$ ) of the drug, a significant  
229 reduction in enzymatic activity was observed **(Figure 3 – figure supplement 2B)**. Thus, although  
230 R86 is involved in an electrostatic interaction as revealed by the crystal structure, the mutational  
231 analysis demonstrated that the inhibition potency of artesunate is retained even in the absence of this  
232 interaction. This observation is in contrast to the GephE structure where the replacement of Arg  
233 (Arg653 in gephyrin) with the bulkier aromatic Trp, prevented artesunate binding (Kasaragod et al.,  
234 2019). Thus, our structures help to define the molecular signatures of artemisinin-binding pockets,  
235 which may aid in the future identification of target sites, especially by *in silico* approaches.

236

237 **Artemisinin inhibits GABA biosynthesis and downregulate GABAergic neurotransmission:**  
238 To understand if the functional consequences of our biochemical and structural analyses correlate  
239 with a physiological scenario, we performed whole-cell voltage-clamp recordings (**Figure 4, Source**  
240 **data 3**) from CA1 pyramidal cells in hippocampal slices and determined the properties of GABAergic  
241 miniature inhibitory postsynaptic currents (mIPSCs) in the absence and presence of artemisinins (10  
242 and 30  $\mu$ M, **Figure 4A-B**), measured within 10 minutes of drug application. In line with our earlier  
243 findings (Kasaragod et al., 2019), artemisinin down-regulated mIPSC amplitudes already at 10  $\mu$ M  
244 (from  $56.7 \pm 1.9$  pA to  $38.8 \pm 2.6$  pA,  $n = 7$  from 4 mice,  $p = 0.003$ , paired t-test; **Figure 4A and C**),  
245 which we attribute to the artemisinin-induced disruption of postsynaptic GABA<sub>A</sub>R-gephyrin  
246 complexes. In addition, artemisinin altered mIPSC kinetics with slower rise and decay times (**Figure**  
247 **4E-F**). While a significant reduction in amplitudes was retained at a higher concentration (30  $\mu$ M), we  
248 also observed a concomitant decrease in mIPSC frequency from  $5.0 \pm 0.61$  Hz to  $3.9 \pm 0.48$  Hz, ( $n =$   
249  $7$  from 5 mice,  $p = 0.003$ , **Figure 4B and D**) in the presence of artemisinin. This is particularly  
250 noteworthy in the context of this study as it reflects changes in the presynaptic terminals, e.g. it would  
251 be in line with a reduced synthesis of the neurotransmitter GABA (Engel et al., 2001).

252 To evaluate if the decreased mIPSC frequencies were due to changes in the activity of GAD, the  
253 GABA synthesizing enzyme, we first quantified the expression of this enzyme in hippocampal neurons  
254 (DIV14 **Source data 4**). This analysis revealed no altered protein expression levels (**Figure 5A and**  
255 **B**). Next, we analyzed the expression levels of PDXK (**Figure 5A and C**), which synthesizes the  
256 obligatory cofactor PLP for the activity of GAD and observed that its expression level was also  
257 unaffected by artemisinin treatment. As a qualitative measure, we also stained hippocampal neurons  
258 for PDXK, GAD and the postsynaptic marker gephyrin, which did not reveal any noticeable differences  
259 in the expression of these marker proteins (**Figure 5 – figure supplement 1 and 2**). Finally, to check  
260 if the frequency changes observed in the electrophysiology measurements were due to changes in  
261 the activity of GAD, we measured the amount of GABA being synthesized in primary hippocampal  
262 neurons (DIV14). GABA levels were quantified by the classical ninhydrin reaction (**Figure 5 – figure**  
263 **supplement 3**) by measuring the fluorescence emission of the resulting adduct at 450 nm and

264 calibrating it with a GABA standard. Remarkably, this analysis revealed a significant reduction in the  
265 amount of GABA production ( $5.4 \pm 0.8$ ,  $3.2 \pm 0.9$  and  $3.6 \pm 0.98$  GABA/mg protein/h) in hippocampal  
266 neurons treated with artemisinin at concentrations of 3, 10 and 30  $\mu$ M, respectively ( $p=0.0054$ ,  $0.0007$   
267 and  $0.0002$  against DMSO measurements and  $p=0.018$ ,  $0.0087$  and  $0.0047$  against hippocampal  
268 measurements for 3, 10 and 30  $\mu$ M artemisinin concentrations) (Figure 5D). In comparison, untreated  
269 samples resulted in levels of  $9.8 \pm 1.5$   $\mu$ g GABA/mg protein/h. The observed perturbation on the  
270 presynaptic side is therefore due to the direct effect of artemisinins on the biosynthesis of PLP, which  
271 results in a reduced production of this cofactor, which is required by the GAD enzyme to produce the  
272 neurotransmitter GABA (Figure 5E).

273

#### 274 **DISCUSSION:**

275 Despite their widespread clinical application as anti-malarial drugs, and despite their known effects  
276 on various cellular pathways in mammals, the molecular mechanisms of how artemisinins affect  
277 cellular pathways are still only poorly understood. Artemisinins can efficiently cross the blood-brain  
278 barrier (Davis et al., 2003) and, strikingly, administrations of high levels of artemisinins are  
279 accompanied by severe neurotoxic side effects (Brewer et al., 1994; Schmuck et al., 2002; Wesche  
280 et al., 1994). Recently, we were able to derive the first protein-artemisinin structure by X-ray  
281 crystallography at 1.5 Å resolution, namely that of the scaffolding protein gephyrin in complex with  
282 artesunate and artemether (Kasaragod et al., 2019). Here, we successfully validated and elucidated  
283 the mechanism underlying yet another mammalian artemisinin target, the critically important  
284 metabolic enzyme PDXK.

285 Our structural studies demonstrate a competition between the substrate pyridoxal and artemisinins,  
286 in line with the observed inhibition of the enzyme derived from kinetic data. As artesunate targets the  
287 same binding pocket identified previously for the interaction of (*R*)-roscovitine with PDXK (Bach et al.,  
288 2005; Tang et al., 2005) and for the neurotoxins ginkgotoxin and theophylline (Gandhi et al., 2012),  
289 our structure suggests that the neurotoxicity induced by artemisinins could be due, at least in part, to  
290 their binding to PDXK and the resulting inhibition of its activity.

291 The presynaptic effect of artemisinin in our electrophysiological recordings correlates nicely with the  
292 down-regulation of PDXK activity and can be extended towards glycine, the other major inhibitory  
293 neurotransmitter. This neurotransmitter is synthesized by serine hydroxymethyl transferase (SHMT),  
294 again in a strictly PLP-dependent fashion. Thus, we predict a similar electrophysiological behavior  
295 with decreased frequencies at glycinergic synapses as observed for GAD and GABA levels. We have  
296 already demonstrated a decrease in glycinergic currents following artemisinin treatment (Kasaragod  
297 et al., 2019). Thus, the data presented here extend our current understanding of how artemisinins act  
298 at inhibitory synapses in the CNS. The present study shows that artemisinins not only act at the  
299 postsynaptic side, but also affect the functionality of the presynaptic terminals via their interaction with  
300 PDXK which ultimately leads to a decrease in neurotransmitter biosynthesis (Figure 6). Although the  
301 data presented here and our earlier study (Kasaragod et al., 2019) define mechanisms underlying the  
302 downregulation of inhibitory neurotransmission by artemisinins, other neurotransmitters such as  
303 dopamine, histamine and serotonin are also synthesized in a PLP-dependent manner, thus future  
304 studies will be required to comprehensively dissect the molecular details underlying the artemisinin-  
305 induced regulation of neurotransmitter levels and the resulting physiological consequences.

306 In addition, a comparison of the artemisinin binding pockets in mPDXK and GephE revealed common  
307 denominators of drug recognition. Notably, in both cases, artemisinins engage in crucial van der  
308 Waals interactions with aromatic residues. In addition, in GephE as well as PDXK, the side chain of  
309 an Arg contributes to artesunate binding, which stabilizes the drug through an electrostatic interaction  
310 with its succinate moiety, thus revealing common signatures of artemisinin binding pockets. Our  
311 results thus not only broaden the understanding of target recognition by artemisinins at the structural  
312 level, but also provide important new insights into how these interactions impair inhibitory synaptic  
313 transmission in the brain and on how this might account for the neurological side effects of these  
314 drugs. Future studies, along with molecular signatures revealed in our structures, will be required to  
315 investigate if artemisinins indeed directly bind to and also modulate the activities of other mammalian  
316 targets such as protein disulfide isomerase and fatty acid synthase which were identified earlier (Li et  
317 al., 2017).

318

319 **ACKNOWLEDGEMENTS:**

320 We want to thank Dr. Antje Gohla for providing the cDNA of mPDXK as well as Dana Wegmann and  
321 Christine Schmitt for their excellent technical assistance. We also thank the beamline scientists at  
322 beamline ID23-A1, ESRF, Grenoble, for technical assistance during data collection. We are grateful  
323 to Dr. Kunimichi Suzuki for the critical reading of the manuscript. This work was supported by the  
324 Deutsche Forschungsgemeinschaft (SCHI425/8-2) and the Rudolf Virchow Center for Experimental  
325 Biomedicine to HS. APM was supported by the Graduate School for Life Sciences at the University  
326 of Würzburg. VBK is supported at the MRC LMB by an EMBO Long Term Fellowship (ALTF137-  
327 2019).

328

329 **AUTHOR CONTRIBUTIONS:**

330 Conceptualization, V.B.K. and H.S.; Methodology, V.B.K., A.P.M., NS., F.Z., and N.B.; Investigation,  
331 V.B.K., A.P.M., N.S., F.Z., and N.B.; Writing – Original Draft, V.B.K.; Writing – Review & Editing,  
332 V.B.K., C.V., C.A. and H.S.; Funding Acquisition, H.S.; Resources, C.A. C.V, and H.S.; Supervision,  
333 V.B.K., C.A., C.V., and H.S.

334

335 **CONFLICT OF INTEREST:**

336 The authors declare that they have no conflicts of interest.

337

338 **REFERENCES:**

339

340 Ackermann, A.M., Moss, N.G., and Kaestner, K.H. (2018). GABA and Artesunate Do Not Induce  
341 Pancreatic alpha-to-beta Cell Transdifferentiation In Vivo. *Cell Metab* 28, 787-792 e783.

342 Adams, P.D., Afonine, P.V., Bunkoczi, G., Chen, V.B., Davis, I.W., Echols, N., Headd, J.J., Hung,  
343 L.W., Kapral, G.J., Grosse-Kunstleve, R.W., *et al.* (2010). PHENIX: a comprehensive Python-based  
344 system for macromolecular structure solution. *Acta Crystallogr D Biol Crystallogr* 66, 213-221.

345 Ashkenazy, H., Abadi, S., Martz, E., Chay, O., Mayrose, I., Pupko, T., and Ben-Tal, N. (2016).  
346 ConSurf 2016: an improved methodology to estimate and visualize evolutionary conservation in  
347 macromolecules. *Nucleic Acids Res* 44, W344-350.

348 Bach, S., Knockaert, M., Reinhardt, J., Lozach, O., Schmitt, S., Baratte, B., Koken, M., Coburn, S.P.,  
349 Tang, L., Jiang, T., *et al.* (2005). Roscovitine targets, protein kinases and pyridoxal kinase. *J Biol*  
350 *Chem* 280, 31208-31219.

351 Brewer, T.G., Grate, S.J., Peggins, J.O., Weina, P.J., Petras, J.M., Levine, B.S., Heiffer, M.H., and  
352 Schuster, B.G. (1994). Fatal neurotoxicity of arteether and artemether. *Am J Trop Med Hyg* 51, 251-  
353 259.

354 Crespo-Ortiz, M.P., and Wei, M.Q. (2012). Antitumor activity of artemisinin and its derivatives: from a  
355 well-known antimalarial agent to a potential anticancer drug. *J Biomed Biotechnol* 2012, 247597.

356 Davis, T.M.E., Binh, T.Q., Ilett, K.F., Batty, K.T., Phuong, H.L., Chiswell, G.M., Phuong, V.D.B., and  
357 Agus, C. (2003). Penetration of dihydroartemisinin into cerebrospinal fluid after administration of  
358 intravenous artesunate in severe falciparum malaria. *Antimicrob Agents Ch* 47, 368-370.

359 di Salvo, M.L., Safo, M.K., and Contestabile, R. (2012). Biomedical aspects of pyridoxal 5'-phosphate  
360 availability. *Front Biosci (Elite Ed)* 4, 897-913.

361 Dixon, M. (1953). The determination of enzyme inhibitor constants. *Biochem J* 55, 170-171.

362 Eliot, A.C., and Kirsch, J.F. (2004). Pyridoxal phosphate enzymes: mechanistic, structural, and  
363 evolutionary considerations. *Annu Rev Biochem* 73, 383-415.

364 Elsinghorst, P.W., di Salvo, M.L., Parroni, A., and Contestabile, R. (2015). Inhibition of human  
365 pyridoxal kinase by 2-acetyl-4-((1R,2S,3R)-1,2,3,4-tetrahydroxybutyl)imidazole (THI). *J Enzyme Inhib*  
366 *Med Chem* 30, 336-340.

367 Emsley, P., and Cowtan, K. (2004). Coot: model-building tools for molecular graphics. *Acta*  
368 *Crystallogr D Biol Crystallogr* 60, 2126-2132.

369 Engel, D., Pahner, I., Schulze, K., Frahm, C., Jarry, H., Ahnert-Hilger, G., and Draguhn, A. (2001).  
370 Plasticity of rat central inhibitory synapses through GABA metabolism. *J Physiol* 535, 473-482.

371 Evans, P.R., and Murshudov, G.N. (2013). How good are my data and what is the resolution? *Acta*  
372 *Crystallogr D Biol Crystallogr* 69, 1204-1214.

373 Gandhi, A.K., Desai, J.V., Ghatge, M.S., di Salvo, M.L., Di Biase, S., Danso-Danquah, R., Musayev,  
374 F.N., Contestabile, R., Schirch, V., and Safo, M.K. (2012). Crystal structures of human pyridoxal

375 kinase in complex with the neurotoxins, ginkgotoxin and theophylline: insights into pyridoxal kinase  
376 inhibition. *PLoS One* 7, e40954.

377 Gautam, A., Ahmed, T., Batra, V., and Paliwal, J. (2009). Pharmacokinetics and pharmacodynamics  
378 of endoperoxide antimalarials. *Curr Drug Metab* 10, 289-306.

379 Goddard, T.D., Huang, C.C., Meng, E.C., Pettersen, E.F., Couch, G.S., Morris, J.H., and Ferrin, T.E.  
380 (2018). UCSF ChimeraX: Meeting modern challenges in visualization and analysis. *Protein Sci* 27,  
381 14-25.

382 Hanna, M.C., Turner, A.J., and Kirkness, E.F. (1997). Human pyridoxal kinase. cDNA cloning,  
383 expression, and modulation by ligands of the benzodiazepine receptor. *J Biol Chem* 272, 10756-  
384 10760.

385 Holdiness, M.R., Justice, J.B., Darryl B. Neill, B.D., and Salamone, J.D. (1980) Fluorimetric Assay for  
386 the Determination of Glutamic Acid Decarboxylase Activity in Subregions of Rat Brain Tissue,  
387 *Analytical Letters*, 13:15, 1333-1344.

388 Jones, D.C., Alphey, M.S., Wyllie, S., and Fairlamb, A.H. (2012). Chemical, genetic and structural  
389 assessment of pyridoxal kinase as a drug target in the African trypanosome. *Mol Microbiol* 86, 51-64.

390 Kabsch, W. (2010). Xds. *Acta Crystallogr D Biol Crystallogr* 66, 125-132.

391 Kasaragod, V.B., Hausrat, T.J., Schaefer, N., Kuhn, M., Christensen, N.R., Tessmer, I., Maric, H.M.,  
392 Madsen, K.L., Sotriffer, C., Villmann, C., *et al.* (2019). Elucidating the Molecular Basis for Inhibitory  
393 Neurotransmission Regulation by Artemisinins. *Neuron* 101, 673-689 e611.

394 Kasaragod, V.B., and Schindelin, H. (2016). Structural Framework for Metal Incorporation during  
395 Molybdenum Cofactor Biosynthesis. *Structure* 24, 782-788.

396 Kasaragod, V.B., and Schindelin, H. (2018). Structure-Function Relationships of Glycine and GABAA  
397 Receptors and Their Interplay With the Scaffolding Protein Gephyrin. *Front Mol Neurosci* 11, 317.

398 Kerry, J.A., Rohde, M., and Kwok, F. (1986). Brain pyridoxal kinase. Purification and characterization.  
399 *Eur J Biochem* 158, 581-585.

400 Kuper, J., Llamas, A., Hecht, H.J., Mendel, R.R., and Schwarz, G. (2004). Structure of the  
401 molybdopterin-bound Cnx1G domain links molybdenum and copper metabolism. *Nature* 430, 803-  
402 806.

- 403 Kwok, F., and Churchich, J.E. (1979). Brain pyridoxal kinase. Purification, substrate specificities, and  
404 sensitized photodestruction of an essential histidine. *J Biol Chem* 254, 6489-6495.
- 405 Laskowski, R.A., Watson, J.D., and Thornton, J.M. (2005). ProFunc: a server for predicting protein  
406 function from 3D structure. *Nucleic Acids Res* 33, W89-93.
- 407 Li, J., Casteels, T., Frogne, T., Ingvorsen, C., Honore, C., Courtney, M., Huber, K.V., Schmitner, N.,  
408 Kimmel, R.A., Romanov, R.A., *et al.* (2017). Artemisinins Target GABAA Receptor Signaling and  
409 Impair alpha Cell Identity. *Cell* 168, 86-100 e115.
- 410 Li, M.H., Kwok, F., Chang, W.R., Lau, C.K., Zhang, J.P., Lo, S.C., Jiang, T., and Liang, D.C. (2002).  
411 Crystal structure of brain pyridoxal kinase, a novel member of the ribokinase superfamily. *J Biol Chem*  
412 277, 46385-46390.
- 413 Li, M.H., Kwok, F., Chang, W.R., Liu, S.Q., Lo, S.C., Zhang, J.P., Jiang, T., and Liang, D.C. (2004).  
414 Conformational changes in the reaction of pyridoxal kinase. *J Biol Chem* 279, 17459-17465.
- 415 Li, M.Z., and Elledge, S.J. (2007). Harnessing homologous recombination in vitro to generate  
416 recombinant DNA via SLIC. *Nat Methods* 4, 251-256.
- 417 Lineweaver, H., and Burk, D. (1934). The Determination of Enzyme Dissociation Constants. *Journal*  
418 *of the American Chemical Society* 56, 658-666.
- 419 Lowe, I.P., Robinsa, E., and Eyerman, G.S. (1958) The fluorimetric measurement of glutamic  
420 decarboxylase and its distribution in brain. *J. Neurochem.* 3, 8-18.
- 421 McCormick, D.B., Gregory, M.E., and Snell, E.E. (1961). Pyridoxal phosphokinases. I. Assay,  
422 distribution, I. Assay, distribution, purification, and properties. *J Biol Chem* 236, 2076-2084.
- 423 McCoy, A.J., Grosse-Kunstleve, R.W., Adams, P.D., Winn, M.D., Storoni, L.C., and Read, R.J. (2007).  
424 Phaser crystallographic software. *J Appl Crystallogr* 40, 658-674.
- 425 Merigliano, C., Mascolo, E., Burla, R., Saggio, I., and Verni, F. (2018). The Relationship Between  
426 Vitamin B6, Diabetes and Cancer. *Front Genet* 9, 388.
- 427 Musayev, F.N., di Salvo, M.L., Ko, T.P., Gandhi, A.K., Goswami, A., Schirch, V., and Safo, M.K.  
428 (2007). Crystal Structure of human pyridoxal kinase: structural basis of M(+) and M(2+) activation.  
429 *Protein Sci* 16, 2184-2194.



- 430 Neary, J.T., and Diven, W.F. (1970). Purification, properties, and a possible mechanism for pyridoxal  
431 kinase from bovine brain. *J Biol Chem* 245, 5585-5593.
- 432 Percudani, R., and Peracchi, A. (2003). A genomic overview of pyridoxal-phosphate-dependent  
433 enzymes. *EMBO Rep* 4, 850-854.
- 434 Pettersen, E.F., Goddard, T.D., Huang, C.C., Couch, G.S., Greenblatt, D.M., Meng, E.C., and Ferrin,  
435 T.E. (2004). UCSF Chimera--a visualization system for exploratory research and analysis. *J Comput*  
436 *Chem* 25, 1605-1612.
- 437 Robert, X., and Gouet, P. (2014). Deciphering key features in protein structures with the new  
438 ENDscript server. *Nucleic Acids Res* 42, W320-324.
- 439 Safo, M.K., Musayev, F.N., di Salvo, M.L., Hunt, S., Claude, J.B., and Schirch, V. (2006). Crystal  
440 structure of pyridoxal kinase from the *Escherichia coli* pdxK gene: implications for the classification of  
441 pyridoxal kinases. *J Bacteriol* 188, 4542-4552.
- 442 Schmuck, G., Roehrdanz, E., Haynes, R.K., and Kahl, R. (2002). Neurotoxic mode of action of  
443 artemisinin. *Antimicrob Agents Chemother* 46, 821-827.
- 444 Sievers, F., Wilm, A., Dineen, D., Gibson, T.J., Karplus, K., Li, W., Lopez, R., McWilliam, H., Remmert,  
445 M., Soding, J., *et al.* (2011). Fast, scalable generation of high-quality protein multiple sequence  
446 alignments using Clustal Omega. *Mol Syst Biol* 7, 539.
- 447 Tang, L., Li, M.H., Cao, P., Wang, F., Chang, W.R., Bach, S., Reinhardt, J., Ferandin, Y., Galons, H.,  
448 Wan, Y., *et al.* (2005). Crystal structure of pyridoxal kinase in complex with roscovitine and derivatives.  
449 *J Biol Chem* 280, 31220-31229.
- 450 Tu, Y. (2016). Artemisinin-A Gift from Traditional Chinese Medicine to the World (Nobel Lecture).  
451 *Angew Chem Int Ed Engl* 55, 10210-10226.
- 452 Ubbink, J.B., Bissbort, S., Vermaak, W.J., and Delport, R. (1990). Inhibition of pyridoxal kinase by  
453 methylxanthines. *Enzyme* 43, 72-79.
- 454 van der Meulen, T., Lee, S., Noordeloos, E., Donaldson, C.J., Adams, M.W., Noguchi, G.M., Mawla,  
455 A.M., and Huising, M.O. (2018). Artemether Does Not Turn alpha Cells into beta Cells. *Cell Metab*  
456 27, 218-225 e214.

457 Wesche, D.L., DeCoster, M.A., Tortella, F.C., and Brewer, T.G. (1994). Neurotoxicity of artemisinin  
458 analogs in vitro. *Antimicrob Agents Chemother* 38, 1813-1819.

459 WHO, W.H.O. (2015). Guidelines for the Treatment of Malaria. In *Guidelines for the Treatment of*  
460 *Malaria*, 3rd, ed. (Geneva: World Health Organization).

461 Winn, M.D., Ballard, C.C., Cowtan, K.D., Dodson, E.J., Emsley, P., Evans, P.R., Keegan, R.M.,  
462 Krissinel, E.B., Leslie, A.G., McCoy, A., *et al.* (2011). Overview of the CCP4 suite and current  
463 developments. *Acta Crystallogr D Biol Crystallogr* 67, 235-242.

464 Zheng, F., Puppel, A., Huber, S.E., Link, A.S., Eulenburg, V., van Brederode, J.F., Muller, C.P., and  
465 Alzheimer, C. (2016). Activin Controls Ethanol Potentiation of Inhibitory Synaptic Transmission  
466 Through GABAA Receptors and Concomitant Behavioral Sedation. *Neuropsychopharmacology* 41,  
467 2024-2033.

468

469

470

471

472

473

474

475

476

477

478

479

480

481

482

483

484

485

486

487

488

489

490

491

492

493

494

495

496

497

498

499

500 **FIGURES:**  
 501  
 502 **Figure 1:**

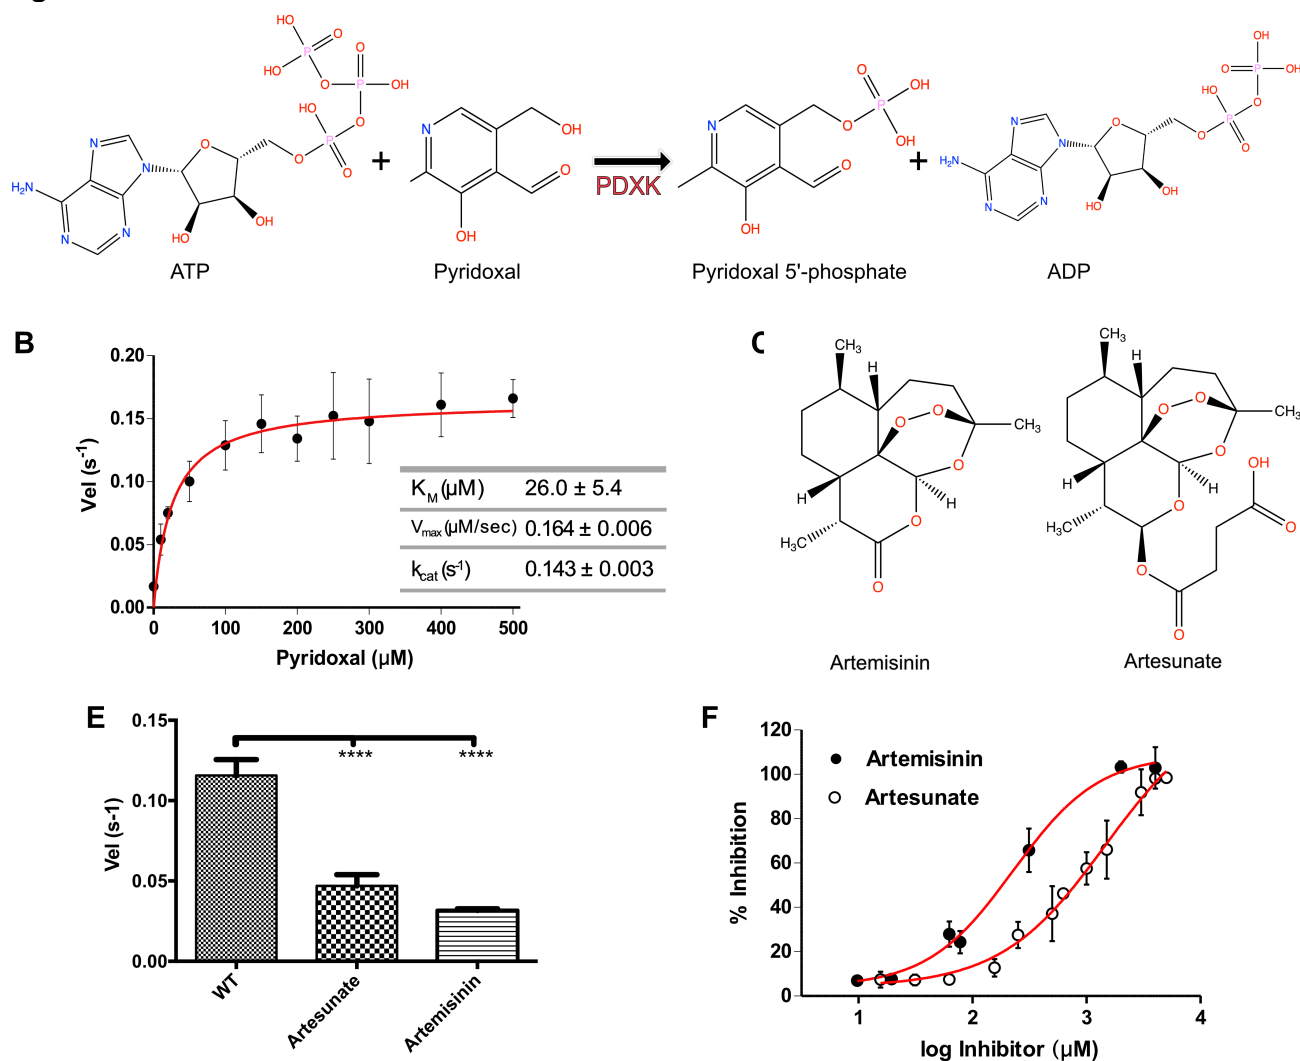

503  
 504 **Figure 1. Biochemical Basis of PDXK Inhibition by Artemisinins.**

505 **(A)** Schematic representation of the reaction catalyzed by pyridoxal kinase (PDXK).

506 **(B)** Michaelis-Menten curve derived for the enzymatic activity of recombinantly purified PDXK.

507 **(C-D)** Chemical structures of artemisinin **(C)** and artesunate **(D)**.

508 **(E)** Enzymatic activity of wild-type PDXK (WT-PDXK) in the absence and presence of artemisinin  
 509 derivatives at a concentration of 1.5 mM (artesunate) and 156  $\mu\text{M}$  (artemisinin), respectively. Data  
 510 are presented as mean  $\pm$  SEM. (p values are: \* $p < 0.05$ ; \*\* $p < 0.01$ ; \*\*\* $p < 0.001$ ; \*\*\*\* $p < 0.0001$ ) (Paired *t*  
 511 test).

512 **(F)** Inhibition curves of PDXK by artemisinin and artesunate used to derive the corresponding  $\text{IC}_{50}$   
 513 values.

514 **Figure 2:**

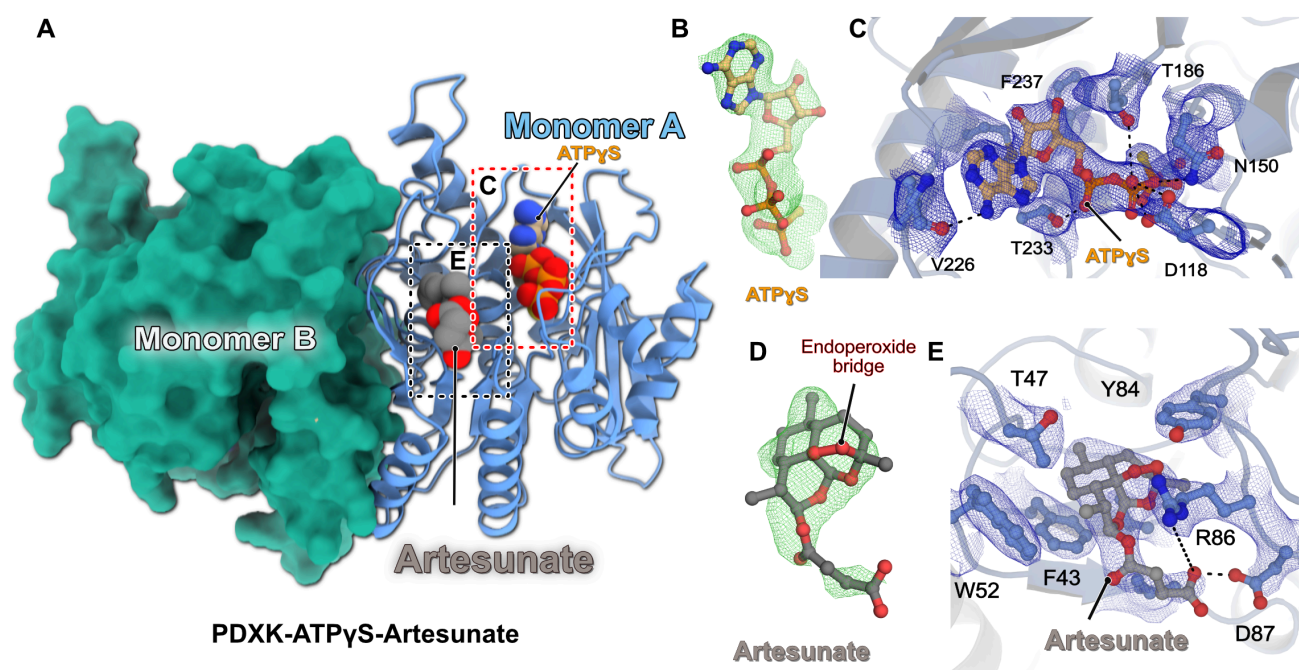

515

516

517 **Figure 2. Structure of the Ternary PDXK-ATP $\gamma$ S-Artesunate Complex.**

518 **(A)** Overall architecture of the ternary complex. One monomer is shown in cartoon representation  
519 with the bound ligands in CPK representation, while the second monomer is shown as a surface in  
520 green.

521 **(B)**  $F_o$ - $F_c$  omit electron density for the bound ATP $\gamma$ S contoured at an rms deviation of three.

522 **(C)** Enlarged view of the ATP $\gamma$ S binding pocket. The bound ligand and residues, which are crucial for  
523 ligand binding, are shown in ball-and-stick representation. The SIGMAA-weighted  $2F_o$ - $F_c$  electron  
524 density for the bound ligand and surrounding residues is contoured at an rmsd of one. Critical protein-  
525 ligand interactions are highlighted.

526 **(D)**  $F_o$ - $F_c$  omit electron density for the bound artesunate contoured at an rms deviation of three.

527 **(E)** Enlarged view of the artesunate-binding pocket. The bound ligand and residues, which are crucial  
528 for ligand binding, are shown in ball-and-stick representation. SIGMAA-weighted  $2F_o$ - $F_c$  electron  
529 density for artesunate and interacting residues contoured at an rmsd of one. Critical protein-ligand  
530 interactions are highlighted.

531

532 **Figure 3:**

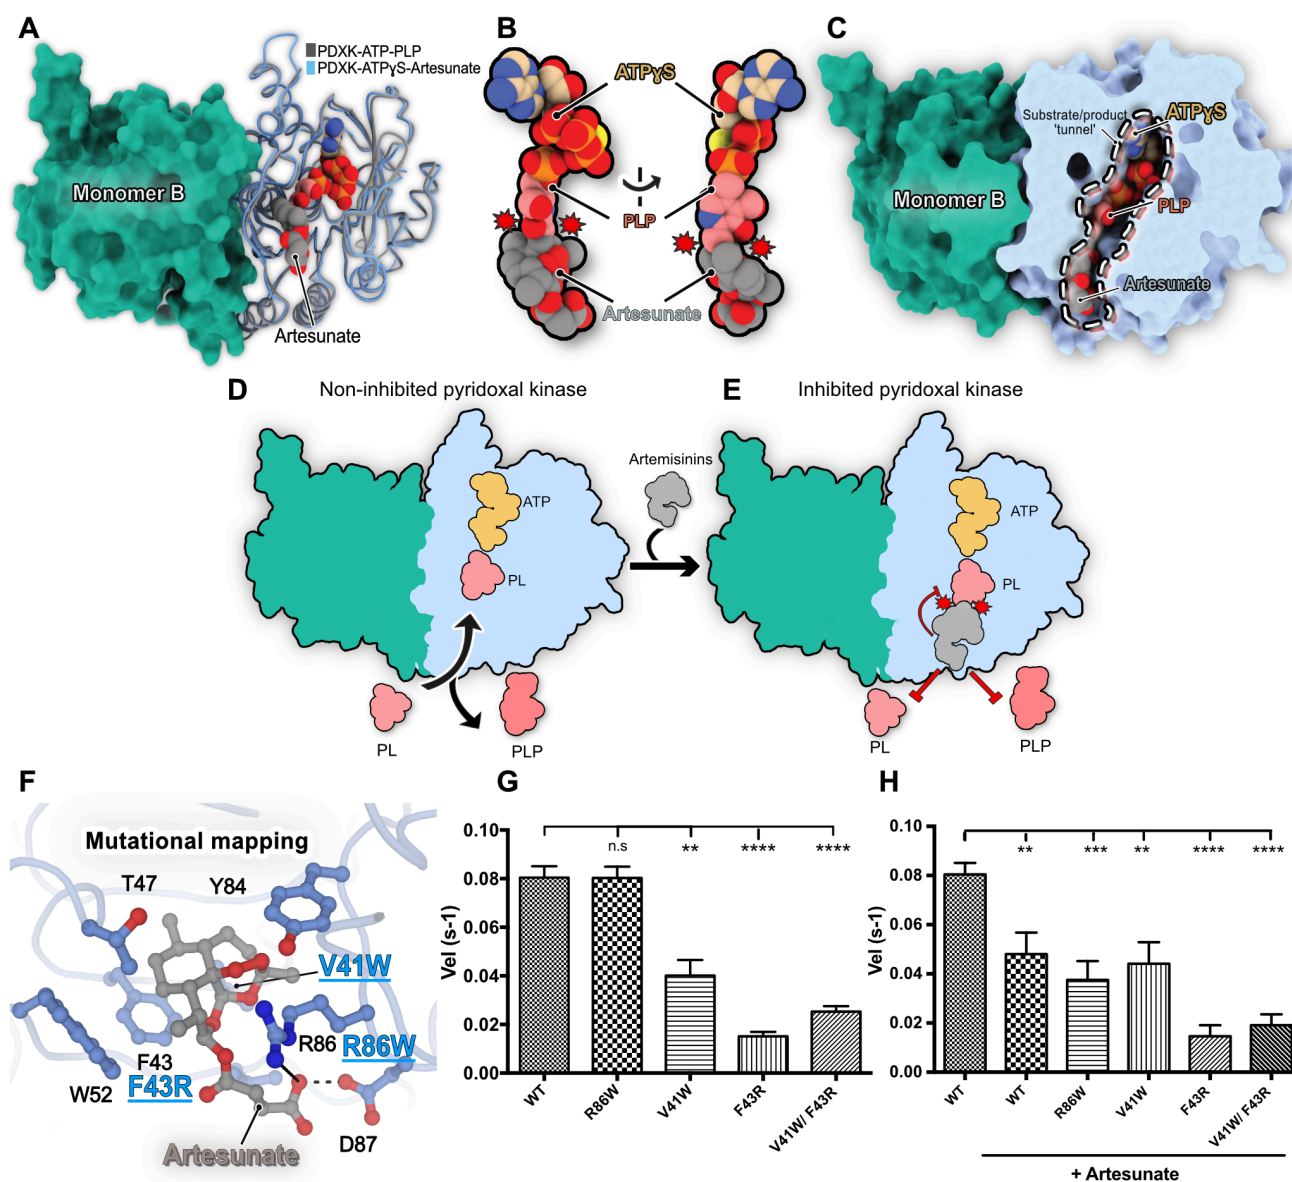

533  
534 **Figure 3. Structural basis for PDXK inhibition by Artemisinins.**

535 **(A)** Superposition of the crystal structures of the ternary murine PDXK-ATP $\gamma$ S-artesunate (this study)  
536 and the human PDXK-ATP-PLP (PDB entry 3KEU) complexes. Carbon-atoms of artesunate are  
537 shown in gray, those of PLP in pink and those of ATP $\gamma$ S in beige, the other atoms are colored in red  
538 (oxygen), blue (nitrogen), orange (phosphorous) and yellow (sulfur). Only ATP $\gamma$ S of the artesunate  
539 complex is shown to reduce visual complexity.

540 **(B)** Enlarged view of the ligand binding pockets of ATP, artesunate and PLP displaying the partial  
541 overlap (indicated by red circles with spikes) between PLP and artesunate.

542 **(C)** Cut-away view of the superimposed PDXK-ATP $\gamma$ S-artesunate and PDXK-ATP $\gamma$ S-PLP structures  
543 displaying how artesunate binding blocks the substrate tunnel which may also impair enzyme  
544 turnover.

545 **(D-E)** Schematic representation of structural basis for the inhibition of PDXK activity by artemisinins.

546 **(F)** Mutational mapping of the artesunate-binding pocket with the investigated mutants highlighted in  
547 blue.

548 **(G-H)** Comparison of the turnover rates of PDXK variants and the WT in the absence **(G)** and  
549 presence **(H)** of artesunate. (\* $p < 0.05$ ; \*\* $p < 0.01$ ; \*\*\* $p < 0.001$ ; \*\*\*\* $p < 0.0001$ ) (Paired *t*-test).

550

551

552

553

554

555

556

557

558

559

560

561

562 **Figure 4:**

563

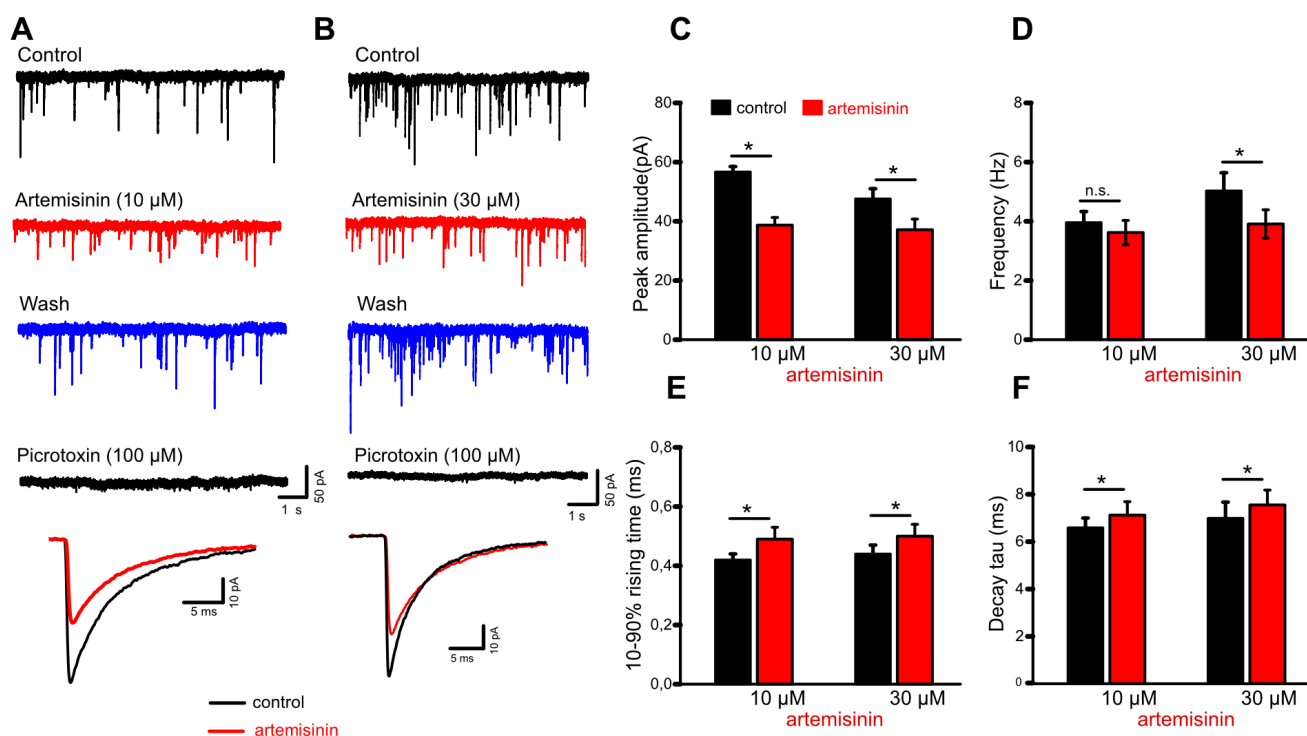

564 **Figure 4. Impact of Artemisinins on Electrophysiological Recordings of Hippocampal Slices:**

565 **(A-B)** Representative voltage-clamp recordings of GABA<sub>A</sub> receptor-mediated mIPSCs from mouse  
566 CA1 pyramidal cells in hippocampal slices were collected before (control), during (10 mins) and after  
567 (wash) artemisinin (10 μM, **A** and 30 μM, **B**) application. Picrotoxin was applied to verify the  
568 GABAergic origin of these events. Superimposed traces below are averaged events before and during  
569 artemisinin treatment.

570 **(C-D)** Quantifications of how artemisinin treatment affects mIPSC amplitudes (**C**), frequencies (**D**)  
571 and kinetics (**E-F**) (10 μM: n = 7; 30 μM: n = 7). \* p < 0.05, paired *t*-test.

572

573

574

575

576

577

578 **Figure 5:**

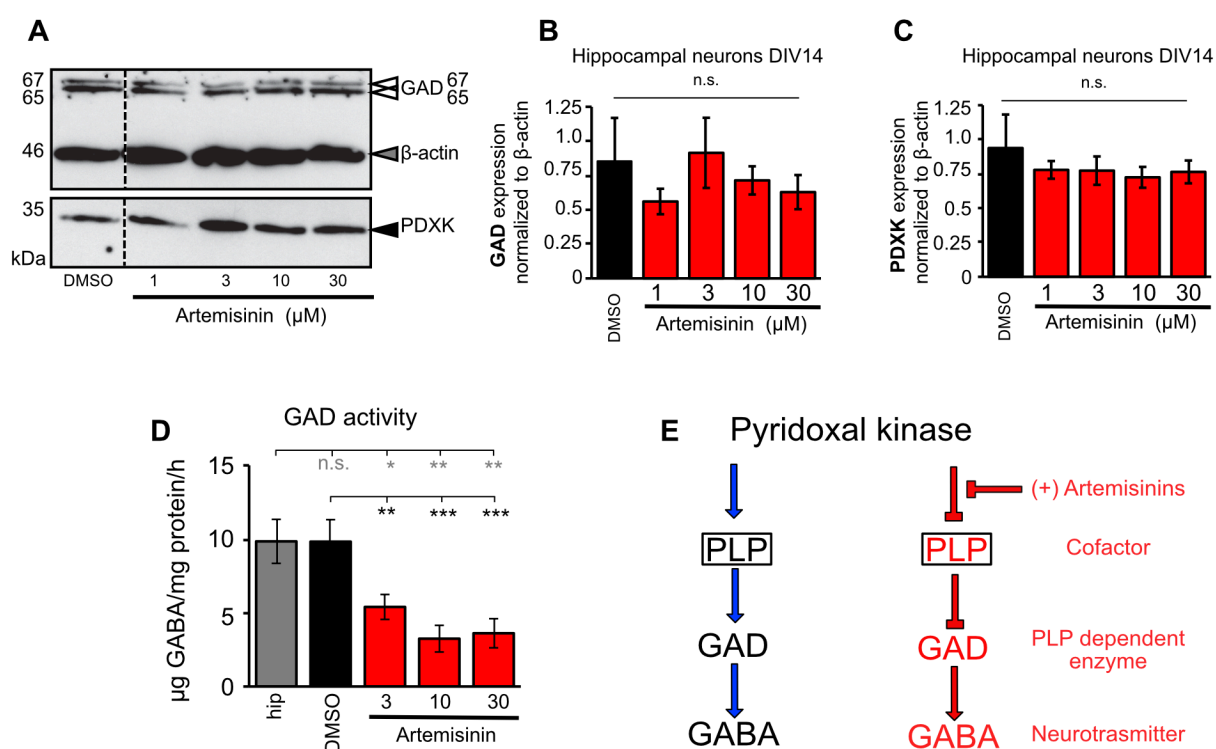

579

580 **Figure 5. Artemisinins impact GABA biosynthesis by down regulating GAD activity:**

581 (A) Representative image of a Western blot stained for GAD (GAD isoforms at 65 and 67 kDa are  
582 indicated by white arrowheads), PDXK (35 kDa, black arrowhead), and  $\beta$ -actin (46 kDa, gray  
583 arrowhead). DMSO treated cells served as internal control.

584 (B) Quantitative analysis of GAD from lysates of hippocampal neurons DIV14 incubated with  
585 increasing concentrations of artemisinin (1, 3, 10, 30  $\mu\text{M}$ ; DMSO served as control) for 2 h. Expression  
586 of GAD was normalized to  $\beta$ -actin expression.

587 (C) PDXK expression analysis after incubation with artemisinins (1, 3, 10, 30  $\mu\text{M}$ ). PDXK expression  
588 was also normalized to  $\beta$ -actin.

589 (D) Measurements of GAD activity in hippocampal samples following treatment with different  
590 concentrations of artemisinin (3, 10, 30  $\mu\text{M}$ ). Tissue without treatment (gray bar) and treated with  
591 DMSO (black bar) served as positive controls. Number of measurements  $n = 8-9$  from three  
592 independent biological replicates. GAD activity decreased significantly with increasing concentrations  
593 of artemisinin. The data were analyzed with a paired  $t$ -test.  $p=0.0054$ ,  $0.0007$  and  $0.0002$  against



594 DMSO measurements and  $p=0.018$ ,  $0.0087$  and  $0.0047$  against hippocampal measurements for  
595 artemisinin concentrations of  $3\mu\text{M}$ ,  $10\mu\text{M}$  and  $30\mu\text{M}$ .

596 **(E)** Schematic representation of the steps leading to GABA biosynthesis at presynaptic terminals. The  
597 left panel shows how GAD synthesizes GABA by utilizing PLP as a cofactor which is produced by  
598 PDXK, while the right panel shows how artemisinins inhibit the initial step in the biosynthesis by  
599 inhibiting PDXK, which, in turn, indirectly impacts downstream biosynthetic processes and eventually  
600 downregulates the amount of neurotransmitter being synthesized.

601

602

603

604

605

606

607

608

609

610

611

612

613

614

615

616

617

618

619

620

621

622 **Figure 6:**

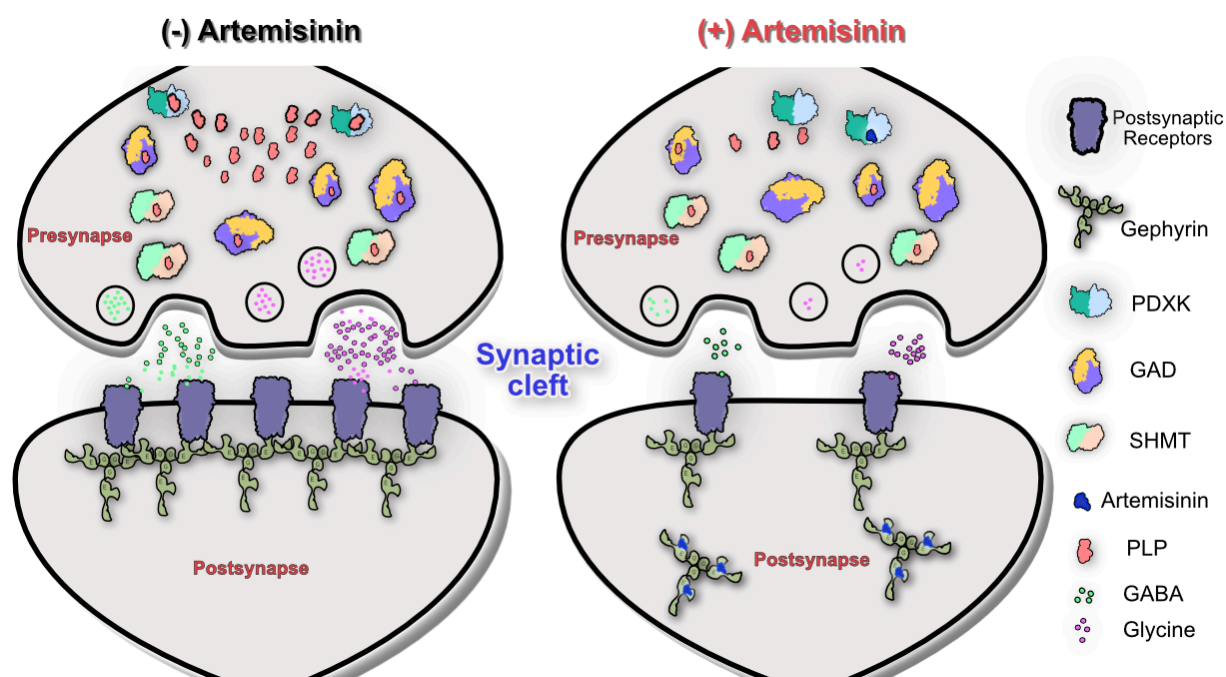

623

624

625 **Figure 6.** Schematic representation of inhibitory synapses in the absence and presence of  
626 artemisinins. This scheme shows that in the absence of artemisinins (left panel) gephyrin clusters the  
627 receptors required for inhibitory neurotransmitters at postsynaptic sides, while PDXK contributes to  
628 the biosynthesis of neurotransmitters at presynaptic terminals by producing the PLP cofactor for GAD  
629 and SHMT enzymes. In contrast, in the presence of artemisinins (right panel), gephyrin-mediated  
630 clustering of receptors at postsynaptic sites is impaired while neurotransmitter biosynthesis at  
631 presynaptic terminals is inhibited.

632

633 **TABLES:**

634

635 **Table 1. Data Collection and Refinement Statistics.**

636

|                                       | PDXK-apo                 | PDXK-ATP $\gamma$ S    | PDXK-ATP $\gamma$ S-<br>artesanate |
|---------------------------------------|--------------------------|------------------------|------------------------------------|
| <b>Data collection</b>                |                          |                        |                                    |
| Space group                           | C2                       |                        |                                    |
| <i>a</i> , <i>b</i> , <i>c</i> (Å)    | 279.13, 53.43, 109.37    | 278.60, 53.02, 109.85  | 279.38, 53.04, 110.15              |
| $\alpha$ , $\beta$ , $\gamma$ (°)     | 90, 90.00, 90            | 90, 91.75, 90          | 90, 91.64, 90                      |
| Resolution (Å)                        | 47.32 - 2.45 (2.53-2.45) | 47.16 - 2.9 (3.03-2.9) | 47.20- 2.4 (2.46-2.4)              |
| <sup>a</sup> <i>R</i> <sub>sym</sub>  | 0.098 (0.75)             | 0.10 (0.739)           | 0.084 (1.069)                      |
| <sup>b</sup> <i>R</i> <sub>pim</sub>  | 0.093 (0.70)             | 0.068 (0.488)          | 0.053 (0.704)                      |
| <i>CC</i> <sub>1/2</sub>              | 0.993 (0.572)            | 0.995 (0.600)          | 0.996 (0.541)                      |
| <sup>c</sup> <  $\sigma$  >           | 9.1 (1.6)                | 9.3 (1.6)              | 8.1 (1.1)                          |
| Completeness (%)                      | 95.6 (99.7)              | 99.7 (99.7)            | 99.7 (99.6)                        |
| Redundancy                            | 3.2 (3.5)                | 3.4 (3.2)              | 3.4 (3.1)                          |
| Reflections used in refinement        | 57174 (5965)             | 36057 (3532)           | 63558 (6235)                       |
| <b>Refinement</b>                     |                          |                        |                                    |
| <sup>d</sup> R-work                   | 0.2162 (0.3042)          | 0.2341 (0.3378)        | 0.2088 (0.3271)                    |
| <sup>e</sup> R-free                   | 0.2596 (0.3237)          | 0.2548 (0.3366)        | 0.2535 (0.3851)                    |
| Number of non-hydrogen atoms          | 9715                     | 9862                   | 9890                               |
| Macromolecules                        | 9411                     | 9606                   | 9445                               |
| Ligands                               | 116                      | 232                    | 304                                |
| Solvent                               | 188                      | 24                     | 141                                |
| RMS(bonds)                            | 0.002                    | 0.005                  | 0.002                              |
| RMS(angles)                           | 0.53                     | 0.73                   | 0.54                               |
| <sup>f</sup> Ramachandran favored (%) | 96.83                    | 96.99                  | 96.76                              |
| Ramachandran allowed (%)              | 3.17                     | 3.01                   | 3.24                               |
| Ramachandran outliers (%)             | 0.00                     | 0.00                   | 0.00                               |
| Average B-factor (Å <sup>2</sup> )    | 57.79                    | 95.87                  | 69.33                              |
| Protein                               | 57.62                    | 95.89                  | 68.94                              |
| Ligands                               | 74.74                    | 95.54                  | 84.27                              |
| Solvent                               | 55.93                    | 91.85                  | 63.08                              |

637

638

639 <sup>a</sup>*R*<sub>sym</sub> =  $\sum_{hkl} \sum_i |I_i - \langle I \rangle| / \sum_{hkl} \sum_i I_i$  where *I<sub>i</sub>* is the *i*<sup>th</sup> measurement and  $\langle I \rangle$  is the weighted mean of all

640 measurements of *I*.

641 <sup>b</sup>*R*<sub>pim</sub> =  $\sum_{hkl} 1 / (N-1)^{1/2} \sum_i |I_i(hkl) - \overline{I(hkl)}| / \sum_{hkl} \sum_i I_i(hkl)$ , where N is the redundancy of the data and

642  $\overline{I(hkl)}$  the average intensity.

643  $\langle I/\sigma \rangle$  indicates the average of the intensity divided by its standard deviation.

644  $R_{\text{work}} = \sum_{hkl} ||F_o| - |F_c|| / \sum_{hkl}|F_o|$  where  $F_o$  and  $F_c$  are the observed and calculated structure factor  
645 amplitudes.

646  $R_{\text{free}}$  same as R for 5% of the data randomly omitted from the refinement. The number of reflections  
647 includes the  $R_{\text{free}}$  subset.

648  $\chi^2$  Ramachandran statistics were calculated with MolProbity.

649 Although the  $\beta$  angle of the apo structure is 90.00 after post-refinement, the crystals display  
650 monoclinic and not orthorhombic symmetry.

651 Numbers in parentheses refer to the respective highest resolution data shell in each dataset.

652

653

654

655

656

657

658

659

660

661

662

663

664

665

666

667

668

669

670

671 **MATERIALS AND METHODS:**

672 **Experimental model and subject details:**

673 For cloning purposes *E. coli* DH5 $\alpha$  was used and the cells were grown on LB-agar plates and in LB  
674 liquid medium at 37°C. For recombinant protein expression *E. coli* SoluBL21<sup>TM</sup> cells were used. The  
675 cells were grown at 37°C initially and were further incubated at 30°C for 16-18 hours after induction.  
676 Transverse hippocampal slices (350  $\mu$ m thick) were prepared from sevoflurane-anesthetized adult  
677 C57Bl/6J mice (2 – 4 months old) of either sex purchased from Charles River (Sulzfeld, Germany).  
678 Adult animals (12 weeks old male or female mice) were taken from the mouse strain CD1 (Strain  
679 code: 022, Charles River, Sulzfeld, Germany) to isolate the hippocampi. Animals were housed under  
680 standard conditions and all procedures were conducted according to the guidelines and with approval  
681 of the local government. Preparation of brain slices containing the hippocampal formation was  
682 performed as previously described (Zheng et al., 2016)

683

684 **Method detail:**

685 **Cloning, Recombinant Protein expression and Purification:**

686 The cDNA encoding mPDXK was subcloned into the pETM14 expression vector harboring a 3C-  
687 precision protease cleavage and BamH1 sites by sequence independent ligation cloning (SLIC) (Li  
688 and Elledge, 2007). The proteins (WT and all mutants) were expressed in the *E. coli* SoluBL21<sup>TM</sup>  
689 strain. Cells were grown at 37 °C and expression was induced with 0.5 mM IPTG at an optical density  
690 (OD<sub>600</sub>) of 0.6-0.8 and cultures were subsequently incubated at 30 °C for 16-18 hours. Following  
691 centrifugation at 8000 x g for 15 min the harvested cells were re-suspended in lysis buffer containing  
692 50 mM Tris pH 8, 300 mM NaCl and 5 mM  $\beta$ -mercaptoethanol ( $\beta$ -ME) and lysis was performed by  
693 using a microfluidizer. For purification, a two-step protocol was employed consisting of an initial Ni-  
694 affinity chromatography with Ni-IDA beads, which was followed by cleavage of the N-terminal His<sub>6</sub>-  
695 tag by incubating with 3C precision protease overnight at 4°C. Finally, size exclusion chromatography  
696 on a Superdex 200 26/60 (GE Healthcare) column was performed in SEC buffer (20 mM Tris pH 8,  
697 150 mM NaCl and 5 mM  $\beta$ -ME) to purify the protein to apparent homogeneity.

698 **Size Exclusion Chromatography Coupled to Multi-Angle Light Scattering (SEC-MALS):**

699 SEC-MALS experiments of 100  $\mu$ M WT and all mutants were carried out by using a Superdex 200  
700 10/300 column (GE Healthcare) in SEC buffer. The experiments were performed at a constant flow  
701 rate of 0.5 ml/min at room temperature. The differential refractive index (dRI) and the light scattering  
702 (LS) were monitored with a Dawn Helios detector from Wyatt Technologies and molecular masses  
703 were derived from the dRI and LS measurements.

704

705 **Crystallization:**

706 Crystallization of mPDXK was performed in the apo form and in complex with ATP $\gamma$ S at a protein  
707 concentration of 12 mg/ml corresponding to a molar concentration of 0.3 mM. The protein was mixed  
708 with 2 mM ATP $\gamma$ S and 5 mM MgCl<sub>2</sub> and the complex was incubated on ice for 30 min prior to  
709 crystallization. Crystallization was performed with the sitting drop vapor diffusion method by mixing  
710 equal volumes of protein and mother liquor at 20 °C. The mPDXK-ATP $\gamma$ S-artesunate structure was  
711 determined by soaking mPDXK-ATP $\gamma$ S crystals with different concentrations of artesunate (2-10 mM)  
712 for 30-600 sec. Crystals were transferred into mother liquor (0.18-0.24 M sodium thiocyanate and 18-  
713 26% PEG3350) supplemented with different concentrations of artesunate and 25% glycerol as cryo-  
714 protectant before flash cooling in liquid nitrogen.

715

716 **Data Collection, Structure Determination and Refinement:**

717 Data collection for all crystals was performed at the ESRF, Grenoble, on beamline ID23A-1 at a  
718 wavelength of 0.9724 Å at 100 K. Datasets were indexed and integrated with XDS (Kabsch, 2010)  
719 and subsequently scaled and merged with AIMLESS (Evans and Murshudov, 2013) from the CCP4  
720 suite (Winn et al., 2011). The apo-structure and the binary mPDXK-ATP $\gamma$ S complex were determined  
721 by molecular replacement with PhaserMR (McCoy et al., 2007) using the human PDXK structure  
722 (PDB: 2YXT) as search model and the ternary mPDXK-ATP $\gamma$ S-artesunate complex was solved with  
723 the apo mPDXK structure as search model. The protein crystallized in space group C2 with four  
724 molecules in the asymmetric unit. Refinement was performed in PHENIX (Adams et al., 2010) with

725 repeated manual model building in COOT (Emsley and Cowtan, 2004). Coordinates and restraints  
726 for artesunate were obtained from our gephyrin-artesunate structure (PDB:6FGC). All figures  
727 representing protein structures were generated with PyMOL (Schrodinger LLC), Chimera (Pettersen  
728 et al., 2004) and ChimeraX (Goddard et al., 2018).

729

### 730 **Enzymatic Activity Assay:**

731 Pyridoxal kinase activity (WT and variants) were measured following a previously described  
732 procedure (Kwok and Churchich, 1979). Briefly, the assay was conducted in 10 mM Hepes buffer (pH  
733 7.3) at 37°C with 100 mM KCl, 1 mM MgCl<sub>2</sub>, 1 mM Mg-ATP and 50 µg/mL BSA (bovine serum  
734 albumin). The pyridoxal kinase concentration was 20 µg/ml (0.6 µM), and the substrate pyridoxal was  
735 added in a range from 10 µM up to 600 µM. The activity was measured following the increase in  
736 absorbance at 388 nm due to PLP formation (extinction coefficient of 4900 M<sup>-1</sup>cm<sup>-1</sup>) in a CLARIOstar  
737 (BMG LABTECH) microplate reader. All experiments were carried out in triplicates. K<sub>M</sub> and k<sub>cat</sub> values  
738 were calculated by a Lineweaver-Burk plot (Lineweaver and Burk, 1934) with the program Prism  
739 (GraphPad Software). For statistical significance of the enzymatic assays, initially, the normality  
740 distribution of the data was determined by a D'Agostino & Pearson normality test. After passing the  
741 normality test, the statistical significance was determined by the paired *t*-test. For all statistical tests,  
742 the p values correspond to \*p<0.05; \*\*p<0.01; \*\*\*p<0.001; \*\*\*\*p<0.0001; ns is not significant.  
743 Statistical analyses were performed by using values from four independent experiments.

744 To derive the K<sub>i</sub> values, the assay was performed under the same conditions using pyridoxal at  
745 concentrations of 50 µM and 150 µM. Using both pyridoxal concentrations the assays were performed  
746 with a 2-fold serial dilution of artesunate and artemisinin, starting at concentrations of 2.5 mM and  
747 0.156 mM, respectively. K<sub>i</sub> values for the inhibitors artesunate and artemisinin were estimated by a  
748 Dixon plot (Dixon, 1953), by using a linear regression fit (p< 0.0001) of the inverted velocity values.  
749 The K<sub>i</sub> value corresponds to the intersection between the two lines obtained for each individual  
750 pyridoxal concentration. For determining the IC<sub>50</sub> values, the values of inhibitor concentration were  
751 transformed to a logarithmic scale and fitted using a nonlinear regression fit with variable slope. IC<sub>50</sub>

752 values were calculated as the concentration of inhibitor that gives a velocity half way between the  
753 minimal and maximal values of the curve. All curve fitting procedures and statistical analyses were  
754 performed using Prism (GraphPad Software).

755

#### 756 **Electrophysiology:**

757 Transverse hippocampal slices (350  $\mu\text{m}$  thick) were prepared from adult C57Bl/6J mice. Animals were  
758 housed under standard conditions and all procedures were conducted according to the guidelines  
759 and with approval of the local government. Whole-cell voltage-clamp recordings were obtained from  
760 visualized pyramidal cells of the hippocampal CA1 region in a submerged chamber with perfusion  
761 solution containing (in mM) 125 NaCl, 3 KCl, 2.5  $\text{CaCl}_2$ , 1.5  $\text{MgCl}_2$ , 1.25  $\text{NaH}_2\text{PO}_4$ , 25  $\text{NaHCO}_3$  and  
762 10 D-glucose at 31° C, constantly gassed with 95%  $\text{O}_2$  - 5%  $\text{CO}_2$  (pH 7.4). Miniature inhibitory  
763 postsynaptic currents (mIPSCs) were recorded in the presence of the ionotropic glutamate receptor  
764 antagonist kynurenic acid (2 mM) and TTX (0.5  $\mu\text{M}$ ) using pipettes filled with solution containing (in  
765 mM), 130 CsCl, 5 HEPES, 3  $\text{MgCl}_2$ , 5 EGTA, 2  $\text{Na}_2\text{ATP}$ , 0.3  $\text{Na}_3\text{GTP}$ , 4 NaCl and 5 QX-314 (pH 7.3).  
766 mIPSCs were recorded at a holding potential of -70 mV as downward deflections. Current signals  
767 were filtered at 2 kHz and sampled at 20 kHz using a Multiclamp 700B amplifier together with a  
768 Digidata 1440A interface and the pClamp10 software (Molecular Devices, Sunnyvale, CA). Data were  
769 analyzed off-line with Clampfit 10.6 (Molecular Devices) and were expressed as means  $\pm$  SEM.  
770 Statistical comparisons of drug effects were performed with OriginPro 2015G (OriginLab Corporation,  
771 MA, USA) using a paired *t*-test. Significance was assumed for p-values < 0.05.

772

#### 773 **Animals for the hippocampal culture:**

774 Adult animals (12 weeks old male or female mice) were taken from the mouse strain CD1 (Strain  
775 code: 022, Charles River, Sulzfeld, Germany) to isolate the hippocampi. Experiments were authorized  
776 by the local veterinary authority and Committee on the Ethics of Animal Experiments (Regierung von  
777 Unterfranken).

778

779



780 **Fluorimetric assay for GAD activity determination:**

781 The basis for the determination of the activity of glutamic decarboxylase (GAD) in brain tissue is the  
782 ninhydrin reaction. During this reaction, the substrate ninhydrin reacts with the amino-group of  $\gamma$ -  
783 aminobutyric acid (GABA) releasing water and forming a Schiff base. Following decarboxylation of  
784 the carboxyl group of the amino acid (GABA) and elimination of the amino acid, amino-ninhydrin is  
785 formed, which dimerizes with ninhydrin (blue color). The concentration of ninhydrin is proportional to  
786 the concentration of the amino acid (Law of Lambert-Beer) and can be measured with a fluorescence  
787 spectrophotometer using an excitation wavelength of 375 nm (6 mm slide width) and an emission  
788 wavelength of 450 nm (10 mm slide width) (dynode voltage 500 volts) (FluoroMax®-4, HORIBA  
789 Scientific, Bangalore, India) (Holdiness et al., 1980; Lowe et al., 1958).

790 The experimental setup was slightly modified from Holdiness et al., 1980. Hippocampi were  
791 transferred into a fresh tube containing sonification buffer (0.5 M KCl, 0.01 M EDTA, 0.5% Triton-  
792 X100 in sodium-phosphate buffer, pH 6.4) followed by sonification for 10 s. Protein concentration was  
793 measured by a Bradford assay and adjusted to 1  $\mu\text{g}/\mu\text{l}$ . The following conditions were analyzed in  
794 triplicates: hippocampi alone, DMSO, 3  $\mu\text{M}$  artemisinin, 10  $\mu\text{M}$  artemisinin and 30  $\mu\text{M}$  artemisinin. For  
795 each sample a probe (P) and blank (B) was used with 100  $\mu\text{l}$  homogenized hippocampi and the  
796 corresponding DMSO/artemisinin concentrations (3  $\mu\text{M}$ , 10  $\mu\text{M}$ , 30  $\mu\text{M}$ ) diluted in sonification buffer.  
797 The B fraction was supplemented with 200  $\mu\text{l}$  10% TCA. The P and B fractions were supplemented  
798 with 100  $\mu\text{l}$  substrate buffer (100 mM sodium-L-glutamate buffer in 0.4 M sodium phosphate buffer,  
799 pH 6.7, 40  $\mu\text{l}$  50 mM pyridoxal phosphate 5-phosphate buffer) and incubated for 2 h at 38 °C.  
800 Subsequently the reaction of the P fraction was also stopped by adding 200  $\mu\text{l}$  10% TCA. Samples  
801 were centrifuged at 950 x g for 20 min. 200  $\mu\text{l}$  of all probes were incubated with 400  $\mu\text{l}$  ninhydrin  
802 (14 mM in 0.5 M sodium carbonate buffer, pH 9.93) at 60°C for 30 min. Afterwards, probes were  
803 incubated with 9 ml copper tartrate (1.6 g sodium carbonate, 329 mg tartaric acid, 300 mg copper-(II)  
804 sulfate in 1 L *aqua dest*) at 22 °C for 20 min and measured (1:10 diluted) in the fluorescence  
805 spectrophotometer. A GABA concentration series of 0, 0.5, 1, 3, 5, 20, 50  $\mu\text{M}$  GABA was used as  
806 standard.

807

## 808 **Preparation of primary hippocampal neurons**

809 Hippocampal neurons were prepared at embryonic day 17 (E17) from pregnant female wild type mice.  
810 Dissociated cells were grown in neurobasal medium supplemented with 5 ml of L-glutamine (200 mM)  
811 and B27 supplement (Life Technologies, A3582801, Germany) with an exchange of 50% medium  
812 after 6 days in culture.

813

## 814 **Protein lysate preparation**

815 At day *in vitro* (DIV) 14, hippocampal neurons were incubated for 2 h with different DMSO/artemisinin  
816 concentrations (1  $\mu$ M, 3  $\mu$ M, 10  $\mu$ M, 30  $\mu$ M). Cells were washed and harvested in phosphate-buffered  
817 saline pH 7.4 with the help of a cell scraper. After a centrifugation step, the pellet was resuspended  
818 in 100  $\mu$ l of brain homogenate buffer (20 mM HEPES, 100 mM KCH<sub>3</sub>COOH, 40 mM KCl, 5 mM EGTA,  
819 5 mM MgCl<sub>2</sub>, 5 mM DTT, 1 mM PMSF, 1% Triton X, protease inhibitor Roche complete, pH 7.2) and  
820 sonicated at low power for 5 s. Protein concentration was determined with the Bradford assay. 10  $\mu$ g  
821 per condition were used for Western Blot analysis.

822

## 823 **Western Blot**

824 For SDS-PAGE, 11% polyacrylamide gels were freshly prepared, followed by Western blot on  
825 nitrocellulose membranes (GE Healthcare, Little Chalfont, UK). Membranes were blocked for 1 h with  
826 5% BSA in TBS-T (TBS with 1% Tween 20). Primary antibodies were incubated overnight at 4°C.  
827 GAD and PDXK proteins were detected with the GAD67/65 specific antibody (ab11070 1:1,000,  
828 abcam, Berlin, Germany) and PDXK specific antibody (NBP1-88283, 1:1000, novusBio, Wiesbaden,  
829 Germany).  $\beta$ -Actin (GTX26276, 1:5,000, GeneTex/Biozol, Irvine, CA, USA) served as loading control.  
830 Signals were detected using the ECL plus system (GE Healthcare, Little Chalfont, UK).

831

## 832 **Data analysis of Western blots**

833 The image quantification was performed using ImageJ (1.51)/Fiji<sup>2</sup> (Schindelin et al., 2012, 2015;  
834 Schneider et al., 2012). The data were analyzed using Student's *t*-test (analysis of variance) and

835 values below  $*p < 0.05$  were considered significant,  $**p < 0.01$ ,  $***p < 0.001$ . The values are displayed  
836 as mean  $\pm$  standard error of the mean ( $\pm$ SEM) or as otherwise noted.

837

### 838 **Immuncytochemical staining**

839 DIV14 primary hippocampal neurons were incubated for 2 h with corresponding DMSO/artemisinin  
840 concentrations (1  $\mu$ M, 3  $\mu$ M, 10  $\mu$ M). Neurons were fixed in 4% paraformaldehyde in PBS for 15 min.  
841 After washing twice with PBS, 50 mM  $\text{NH}_4\text{Cl}$  was added for 10 min. Blocking with 5% goat serum in  
842 PBS (permeabilized with 0.2% Triton X-100) for 30 min at 22°C followed. Primary antibodies were  
843 incubated for 1 h in blocking solution without Triton X-100. GAD, gephyrin and PDXK proteins were  
844 detected with the GAD67/65 specific antibody (ab11070 1:500, abcam, Berlin, Germany), gephyrin  
845 specific antibody (147111, 1:500, Synaptic Systems, Göttingen, Germany) and PDXK specific  
846 antibody (NBP1-88283, 1:150, novusBio, Wiesbaden, Germany), respectively. Secondary antibodies  
847 gamCy3, garCy5 (1:500; Dianova, Hamburg, Germany) and ActinGreenTM (R37110, Thermo Fisher  
848 Scientific, Irvine, CA, USA) were applied for 1 h. Cells were stained with 4',6-diamino-2-phenylindole  
849 (DAPI) and slides were mounted with Mowiol.

850

### 851 **QUANTIFICATION AND STATISTICAL ANALYSIS:**

852 The programs and software used for quantification and statistical analysis are mentioned in the  
853 methods details section in detail. Statistical analyses in this manuscript are described in the  
854 experimental methods section and also in the corresponding figure legends.

855

### 856 **DATA AVAILABILITY:**

857 The coordinates of mPDXK- $\text{apo}$ , mPDXK- $\text{ATP}\gamma\text{S}$  and mPDXK- $\text{ATP}\gamma\text{S}$ -artesunate structures have  
858 been deposited in the Protein Data Bank (PDB) with accession codes 6YJZ, 6YK0 and 6YK1,  
859 respectively.

860

861

862

863 SOURCE TABLE

| REAGENT or RESOURCE                                  | SOURCE           | IDENTIFIER               |
|------------------------------------------------------|------------------|--------------------------|
| <b>Bacterial and Virus Strains</b>                   |                  |                          |
| <i>E. coli</i> DH5 $\alpha$                          | Invitrogen       | N/A                      |
| <i>E. coli</i> SoluBL21                              | amsbio           | N/A                      |
| <b>Chemicals, Peptides, and Recombinant Proteins</b> |                  |                          |
| Artemisinin                                          | Sigma-Aldrich    | Cat# 361593              |
| Artesunate                                           | Sigma-Aldrich    | Cat# A3731               |
| HEPES                                                | Carl Roth        | Cat# 9105.5              |
| DMSO                                                 | Carl Roth        | Cat# 4720.2              |
| Sodium acetate                                       | Carl Roth        | Cat# 6773.2              |
| Sodium chloride                                      | Carl Roth        | Cat# 9105.5              |
| Imidazole                                            | Carl Roth        | Cat# 3899.4              |
| $\beta$ -Mercaptoethanol                             | AppliChem        | Cat# A1108               |
| Ni-IDA beads                                         | Macherey-nagel   | Cat# 1709/ 001           |
| Kanamycin sulfate                                    | Carl Roth        | Cat# T832.4              |
| SDS                                                  | Carl Roth        | Cat# CN30.4              |
| Tris                                                 | Carl Roth        | Cat# 4855.3              |
| Glycine                                              | Carl Roth        | Cat# 3908.3              |
| ATP $\gamma$ S                                       | Jena Biosciences | Cat# NU-406-5            |
| ATP                                                  | Sigma-Aldrich    | Cat# A9187               |
| Pyridoxal                                            | Sigma-Aldrich    | Cat# 271748              |
| KCl                                                  | Carl Roth        | Cat# HN02.3              |
| BSA                                                  | Carl Roth        | Cat# 2834.3              |
| Magnesium chloride                                   | Carl Roth        | Cat# HN03.3              |
| Sodium thiocyanate                                   | Sigma-Aldrich    | Cat# 251410              |
| PEG3350                                              | Sigma-Aldrich    | Cat# P4338               |
| Mouse PDXK-WT                                        | This paper       | N/A                      |
| Mouse PDXK-F43R                                      | This paper       | N/A                      |
| Mouse PDXK-V41W                                      | This paper       | N/A                      |
| Mouse PDXK-R84W                                      | This paper       | N/A                      |
| Mouse PDXK-F43R/ V41W                                | This paper       | N/A                      |
| NaCl                                                 | Carl Roth        | Cas#7647-14-5; #9265     |
| CaCl <sub>2</sub>                                    | Sigma-Aldrich    | Cas#10035-04-8; C5080    |
| MgCl <sub>2</sub>                                    | Sigma-Aldrich    | Cas#13446-34-9; #1375127 |
| NaH <sub>2</sub> PO <sub>4</sub>                     | Carl Roth        | Cas#13472-35-0; #2370.1  |
| NaHCO <sub>3</sub>                                   | Carl Roth        | Cas#144-55-8; #6885.1    |
| D-glucose                                            | Carl Roth        | Cas#14431-43-7; #6780.1  |
| Tetrodotoxin                                         | Tocris           | Cat#1078                 |
| CsCl                                                 | Sigma-Aldrich    | Cas#7647-17-8; C3309     |
| EGTA                                                 | Sigma-Aldrich    | Cas#314-13-6; E2129      |
| Na <sub>2</sub> ATP                                  | Sigma-Aldrich    | Cas#34369-07-8; A7699    |
| Na <sub>3</sub> GTP                                  | Sigma-Aldrich    | Cas#36051-31-7; G8877    |
| QX-314                                               | Sigma-Aldrich    | Cas#21306-56-9; L5783    |
| kynurenic acid                                       | Sigma-Aldrich    | Cas#492-27-3; K3375      |
| <b>GABA- Assay</b>                                   |                  |                          |
| Trichloroacetic acid solution                        | Sigma- Aldrich   | T0699                    |
| sodium Phosphate                                     | Sigma- Aldrich   | 34283                    |
| potassium chloride                                   | Sigma- Aldrich   | P9333                    |
| EDTA ethylenediaminetetraacetic acid                 | Merck Millipore  | E9884                    |
| Triton X-100                                         | Merck Millipore  | X-100                    |

|                                                                |                          |              |
|----------------------------------------------------------------|--------------------------|--------------|
| Sodium Bicarbonate                                             | Sigma- Aldrich           | S5761        |
| Sodium carbonate anhydrous                                     | Sigma- Aldrich           | 223484       |
| Ninhydrin                                                      | Sigma- Aldrich           | 151173       |
| Sodium L-glutamate monohydrate                                 | Sigma- Aldrich           | 1064451000   |
| Sodium carbonate                                               | Merck Millipore          | S7795        |
| Sodium tartrate dihydrate                                      | Sigma- Aldrich           | 1614909      |
| Copper (III)sulfate                                            | Sigma- Aldrich           | 451657       |
| Pyridoxal 5'-Phosphate                                         | Sigma- Aldrich           | P9255        |
| Ortho-Phosphatic acid 85%                                      | Merck                    | 1.00573.1000 |
| Gamma-aminobutyric acid (GABA)                                 | Sigma- Aldrich           | A2129        |
| <b>Cell based experiments</b>                                  |                          |              |
| Neurobasalmedium                                               | Gibco                    | 21103049     |
| B-27 Supplement                                                | Gibco                    | 17504-044    |
| Glutamax                                                       | Gibco                    | 35050-038    |
| DNase                                                          | Roche                    | 04536282001  |
| FCS                                                            | Gibco                    | 10270-106    |
| Trypsin                                                        | PAN Biotech              | P10-023500   |
| PBS                                                            | Gibco                    | 14190-094    |
| HEPES                                                          | Roth                     | 9105.5       |
| Potassium acetate                                              | Roth                     | T874.1       |
| Potassium chloride                                             | Roth                     | P017.1       |
| EGTA                                                           | Roth                     | 3054.3       |
| Magnesium chloride                                             | Roth                     | KK36.3       |
| DTT                                                            | Roth                     | 6908.2       |
| PMSF                                                           | Sigma-Aldrich            | P7626        |
| Protease Inhibitor complete                                    | Roche                    | 11873580001  |
| BSA                                                            | Sigma-Aldrich            | A2153        |
| Bradford solution                                              | Biorad                   | 5000006      |
| Tween-20                                                       | Carl Roth                | 9127.2       |
| ECLplus system                                                 | Thermo Fisher Scientific | 34096/34577  |
| Paraformaldehyde                                               | Carl Roth                | 0335.3       |
| Ammonium chloride                                              | Roth                     | 5050.2       |
| Goat Serum                                                     | abcam                    | Ab138478     |
| 4',6-diamidino-2-phenylindole                                  | Sigma-Aldrich            | 124653       |
| DMSO                                                           | Roth                     | A994.2       |
| GAD67/65                                                       | Abcam                    | Ab11070      |
| Gephyrin                                                       | Synaptic Systems         | 147111       |
| PDXK                                                           | NovusBio                 | NBP1-88283   |
| $\beta$ -actin                                                 | GeneTex/Biozol           | GTX26276     |
| Goat-anti-mouse Cy3                                            | Dianova                  | 115-165-003  |
| Goat-anti-rabbit Cy5                                           | Dianova                  | 115-175-144  |
| ActinGreenTM                                                   | Thermo Fisher Scientific | R37110       |
| Goat-anti-rabbit HRP                                           | Dianova                  | 111-036-003  |
| Goat-anti-mouse HRP                                            | Dianova                  | 115-035-146  |
| <b>Deposited Data</b>                                          |                          |              |
| Crystal structure of the mouse PDXK in apo form                | This paper               | PDB: 6YJZ    |
| Crystal structure of the mouse PDXK-ATP $\gamma$ S complex     | This paper               | PDB: 6YK0    |
| Crystal structure of the mouse PDXK in complex with artesunate | This paper               | PDB: 6YK1    |
| Crystal structure of human PDXK-apo                            | Musayev et al., 2007     | PDB: 2YXT    |

|                                                                        |                              |                                                                                   |
|------------------------------------------------------------------------|------------------------------|-----------------------------------------------------------------------------------|
| Crystal structure of human PDXK- ATP-PLP complex                       | N/A                          | PDB: 3KEU                                                                         |
| Crystal structure of GephE-artesunate complex                          | Kasaragod et al, 2019        | PDB: 6FGC                                                                         |
| <b>Experimental Models: Organisms/Strains</b>                          |                              |                                                                                   |
| C57Bl/6J mice                                                          | Charles River                | www.criver.com                                                                    |
| CD1                                                                    | Charles River                | Strain code: 022                                                                  |
| <b>Oligonucleotides</b>                                                |                              |                                                                                   |
| Forward primer for PDXK-WT:<br>GGAAGTTCTGTTCCAGGGGCCCATGGAG<br>GCGAATG | Sigma-Oligos                 | N/A                                                                               |
| Reverse primer for PDXK-WT:<br>GGTGGTGGTGGTCTCGATTACAGCACT<br>GTGGCCTG | Sigma-Oligos                 | N/A                                                                               |
| Forward primer for PDXK-F43R:<br>GTGAACTCTGTGCAGCGTTCAAACACAC<br>AGG   | Sigma-Oligos                 | N/A                                                                               |
| Reverse primer for PDXK-F43R:<br>CCTGTGTGGTTTGAACGCTGCACAGAGTT<br>CAC  | Sigma-Oligos                 | N/A                                                                               |
| Forward primer for PDXK-V41W:<br>GATGCCGTGAACTCTTGGCAGTTTTCAAA<br>CC   | Sigma-Oligos                 | N/A                                                                               |
| Reverse primer for PDXK-V41W:<br>GGTTTGAAAAGTCCAAAGAGTTCACGGCA<br>TC   | Sigma-Oligos                 | N/A                                                                               |
| Forward primer for PDXK-R86W:<br>CTCACTGGTTACACGTGGGACAAG              | Sigma-Oligos                 | N/A                                                                               |
| Reverse primer for PDXK-R86W:<br>CTTGCCACGTGTAACCAGTGAG                | Sigma-Oligos                 | N/A                                                                               |
| <b>Recombinant DNA</b>                                                 |                              |                                                                                   |
| PDXK-WT-PETM14                                                         | This paper                   | N/A                                                                               |
| PDXK-F43R- PETM14                                                      | This paper                   | N/A                                                                               |
| PDXK-V41W- PETM14                                                      | This paper                   | N/A                                                                               |
| PDXK-R86W- PETM14                                                      | This paper                   | N/A                                                                               |
| PDXK-F43R/ V41W- PETM14                                                | This paper                   | N/A                                                                               |
| <b>Software and Algorithms</b>                                         |                              |                                                                                   |
| XDS                                                                    | Kabsch, 2010                 | N/A                                                                               |
| AIMLESS                                                                | Evans and Murshudov, 2013    | N/A                                                                               |
| CCP4                                                                   | Winn et al., 2011            | N/A                                                                               |
| PhaserMR                                                               | McCoy et al., 2007           | N/A                                                                               |
| PHENIX                                                                 | Adams et al., 2010           | N/A                                                                               |
| COOT                                                                   | Emsley and Cowtan, 2004      | N/A                                                                               |
| UCSF-Chimera                                                           | Pettersen et al., 2004       | N/A                                                                               |
| UCSF-ChimeraX                                                          | Goddard et al., 2018         | N/A                                                                               |
| PyMOL                                                                  | Schrodinger suite            | <a href="https://www.schrodinger.com/pymol">https://www.schrodinger.com/pymol</a> |
| ConSurf                                                                | Ashkenazy et al., 2016       | N/A                                                                               |
| CLARIOStar, version 5.20 R5                                            | CLARIOStar Software          | www.bmglabtech.com                                                                |
| pClamp, version 10.6                                                   | pClamp software              | www.moleculardevices.com                                                          |
| OriginPro 2015G                                                        | Statistic and graph software | www.originlab.com                                                                 |
| GraphPad Prism, version 6.07                                           | GraphPad Software            | www.graphpad.com                                                                  |

865  
866  
867  
868  
869  
870  
871  
872  
873  
874  
875  
876  
877  
878  
879  
880  
881  
882  
883  
884  
885  
886  
887  
888  
889  
890

## Figure supplements

### **Pyridoxal Kinase Inhibition by Artemisinins Downregulates Inhibitory Neurotransmission**

Vikram Babu Kasaragod<sup>1,4,5,\*</sup>, Anabel Pacios-Michelena<sup>1,4</sup>, Natascha Schaefer<sup>2</sup>, Fang Zheng<sup>3</sup>,  
Nicole Bader<sup>1</sup>, Christian Alzheimer<sup>3</sup>, Carmen Villmann<sup>2</sup> and Hermann Schindelin<sup>1,\*</sup>.

**Figure 1 - figure supplement 1**

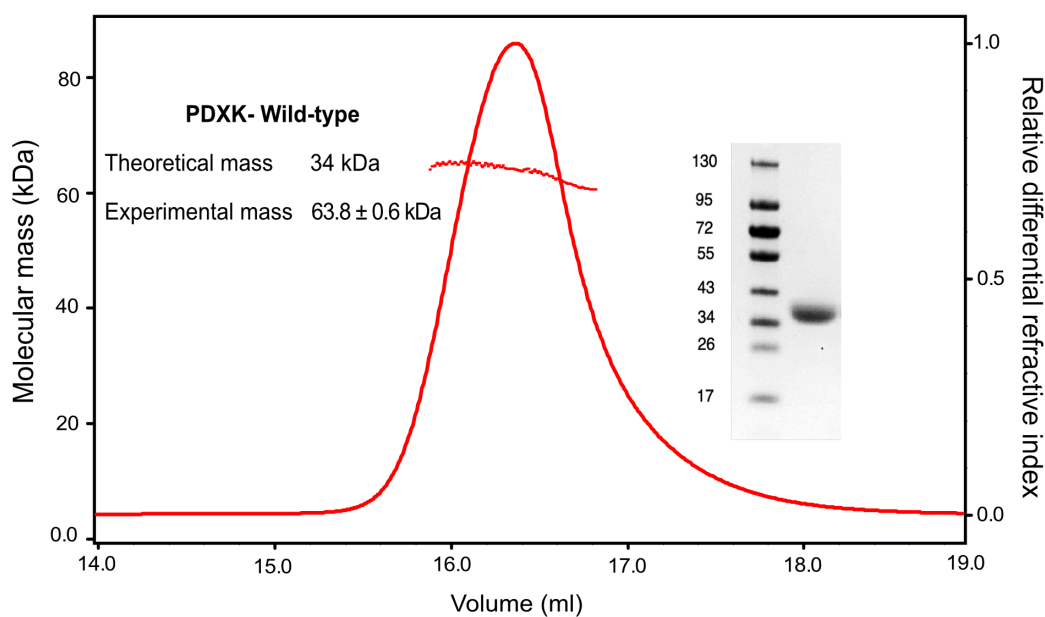

891

892 **Figure 1 – figure supplement 1. MALS measurements of WT PDXK.** Multi angle laser light  
893 scattering coupled to size exclusion chromatography (SEC-MALS) of recombinantly expressed and  
894 purified WT-PDXK along with an SDS-PAGE analysis of the purified protein (inset). Normalized  
895 differential refractive index is represented along with the measured molecular mass under the curve.  
896 The SEC-MALS experiment demonstrates that the protein is dimeric in solution.

897

898

899

900

901

902

903

904



## Figure 1 - figure supplement 2

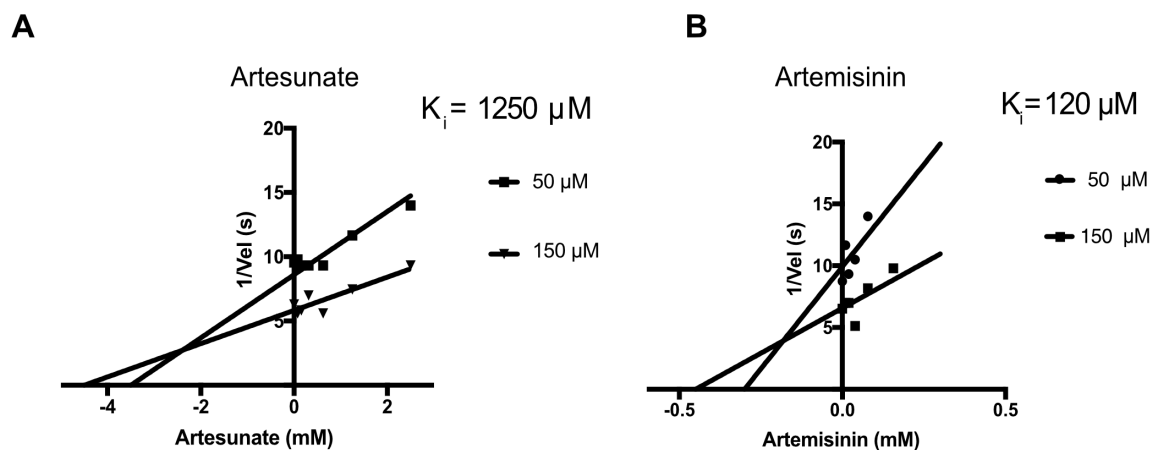

905

906 **Figure 1 – figure supplement 2. Inhibition analysis. (A-B)** Dixon plots for the inhibition of PDXK  
907 by artesunate **(A)** and artemisinin **(B)**. The succinate derivative of artemisinin displays a  $K_i$  of 1250  
908  $\mu$ M in contrast to the more potent artemisinin with a  $K_i$  of 120  $\mu$ M.

909

910

911

912

913

914

915

916

917

918

919

**Figure 2 - figure supplement 1**

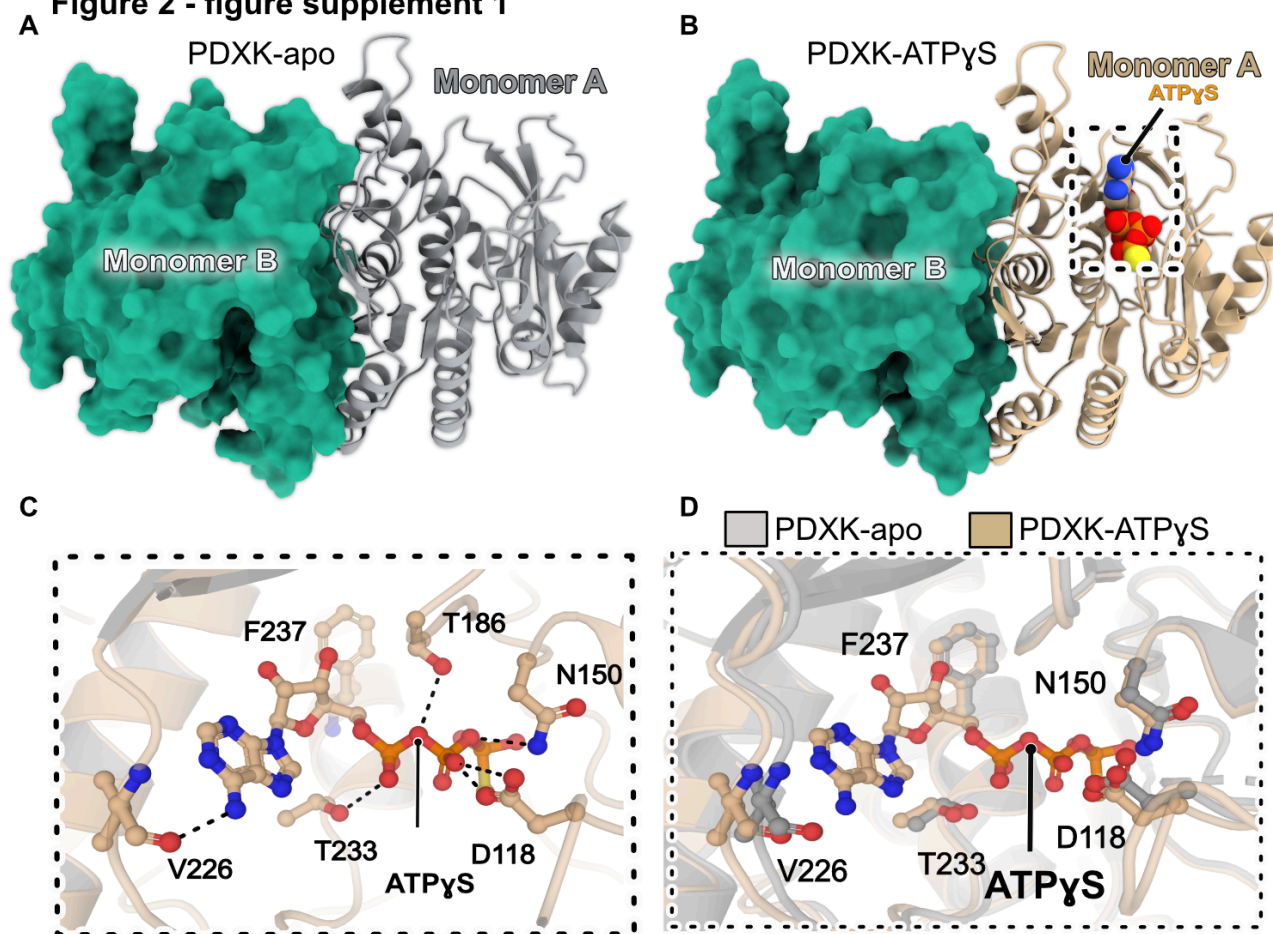

920

921 **Figure 2 – figure supplement 1. Structural comparison of apo-PDXK and the PDXK- $\text{ATP}\gamma\text{S}$**   
922 **complex.**

923 **(A-B)** Overall architecture of apo-PDXK (A) and the PDXK- $\text{ATP}\gamma\text{S}$  (B) complex. One protomer is  
924 shown in cartoon and the second in surface representation.  $\text{ATP}\gamma\text{S}$  is displayed in CPK  
925 representation.

926 **(C)** Enlarged view of the  $\text{ATP}\gamma\text{S}$  binding pocket. The ligand and residues crucial for binding are shown  
927 in ball and stick representation and the protein backbone as a cartoon.

928 **(D)** Comparative analyses of the PDXK- $\text{apo}$  and PDXK- $\text{ATP}\gamma\text{S}$  structures. One monomer of PDXK-  
929 apo and PDXK- $\text{ATP}\gamma\text{S}$  are displayed in gray and brown cartoon representation, respectively, while  
930 the other monomer is displayed in surface representation in green.

931

932

## Figure 2 - figure supplement 2

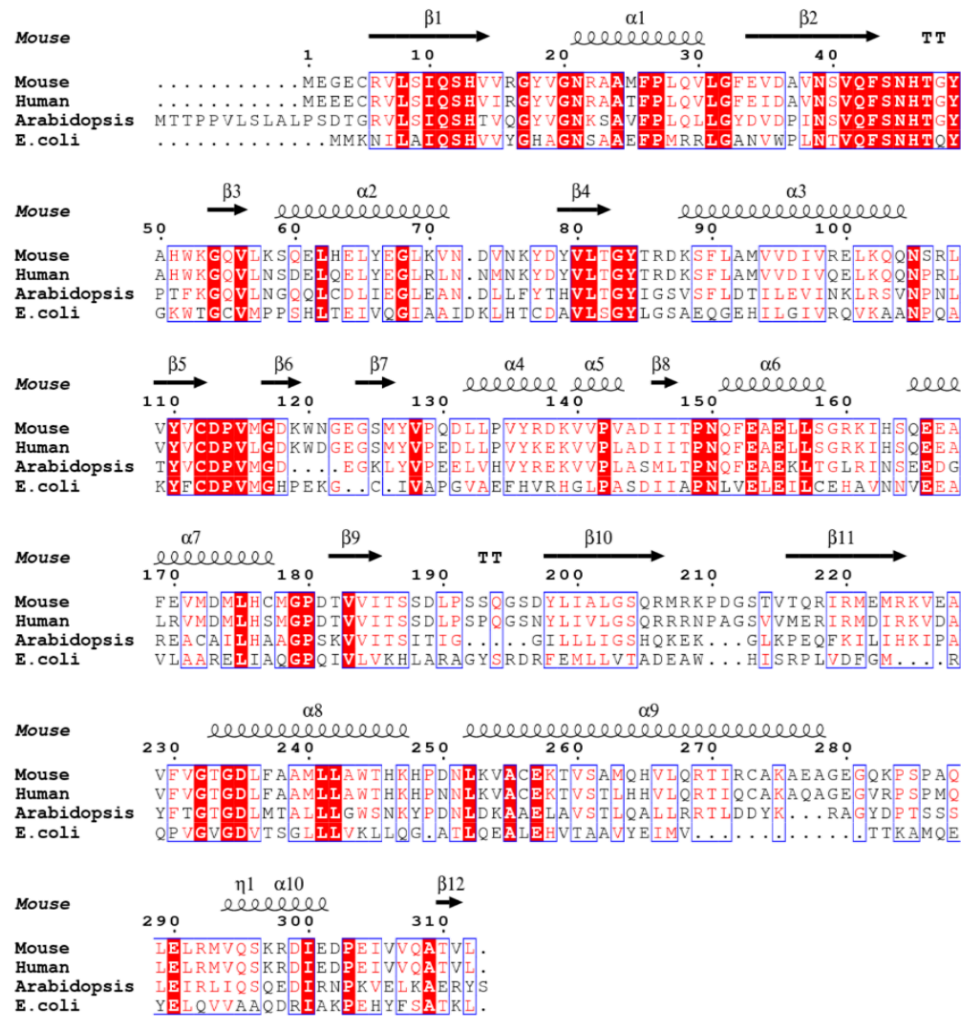

933

934 **Figure 2 – figure supplement 2. Multiple sequence alignment.** Multiple sequence alignment of  
 935 PDXK enzymes from diverse sources obtained with Clustal omega (Sievers et al., 2011) and  
 936 represented by using the ESPript server (Robert and Gouet, 2014).

937

938

939

940

941

942

943

## Figure 2 - figure supplement 3

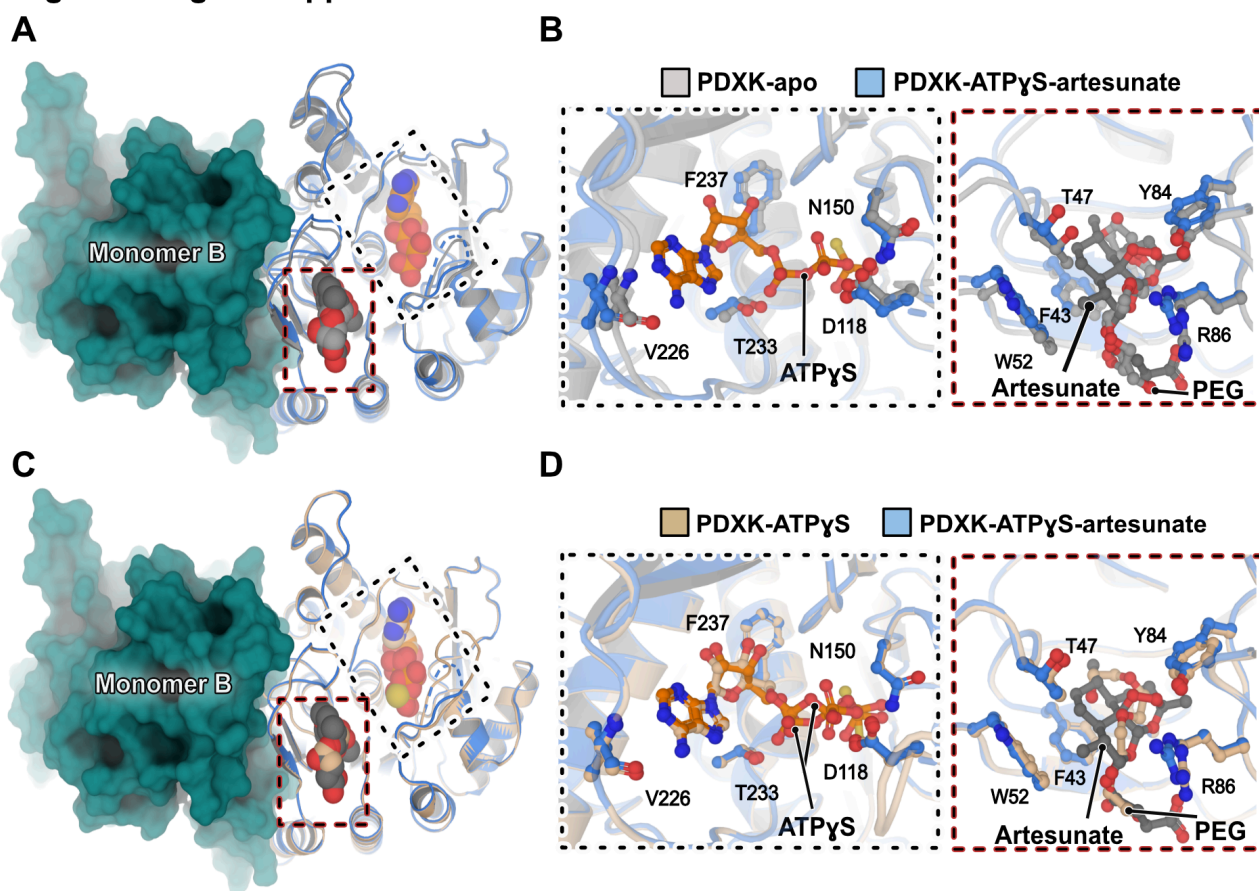

944

945 **Figure 2 – figure supplement 3. Structural comparison of the apo, the PDXK-ATP $\gamma$ S and the**  
946 **PDXK-ATP $\gamma$ S-artesunate structures.**

947 **(A-B)** Comparison of the PDXK-ATP $\gamma$ S-artesunate structure with the apo structure. The overall  
948 architecture is shown in **(A)** and enlarged views of the ligand binding pocket are shown in **(B)**.

949 **(C-D)** Comparison of the PDXK-ATP $\gamma$ S-artesunate structure with the PDXK-ATP $\gamma$ S complex. The  
950 overall architecture is shown in **(C)** and enlarged views of the ligand binding pocket are shown in **(D)**.

951 In panels **B** and **D**, bound ligands and residues, which are crucial for binding, are shown in ball and  
952 stick representation and the protein backbone in cartoon representation. Please note that in the apo  
953 and in the binary PDXK-ATP $\gamma$ S structure, the artemisinin binding pocket is occupied by polyethylene  
954 glycol, a component of the crystallization solution.

955

956

## Figure 2 - figure supplement 4

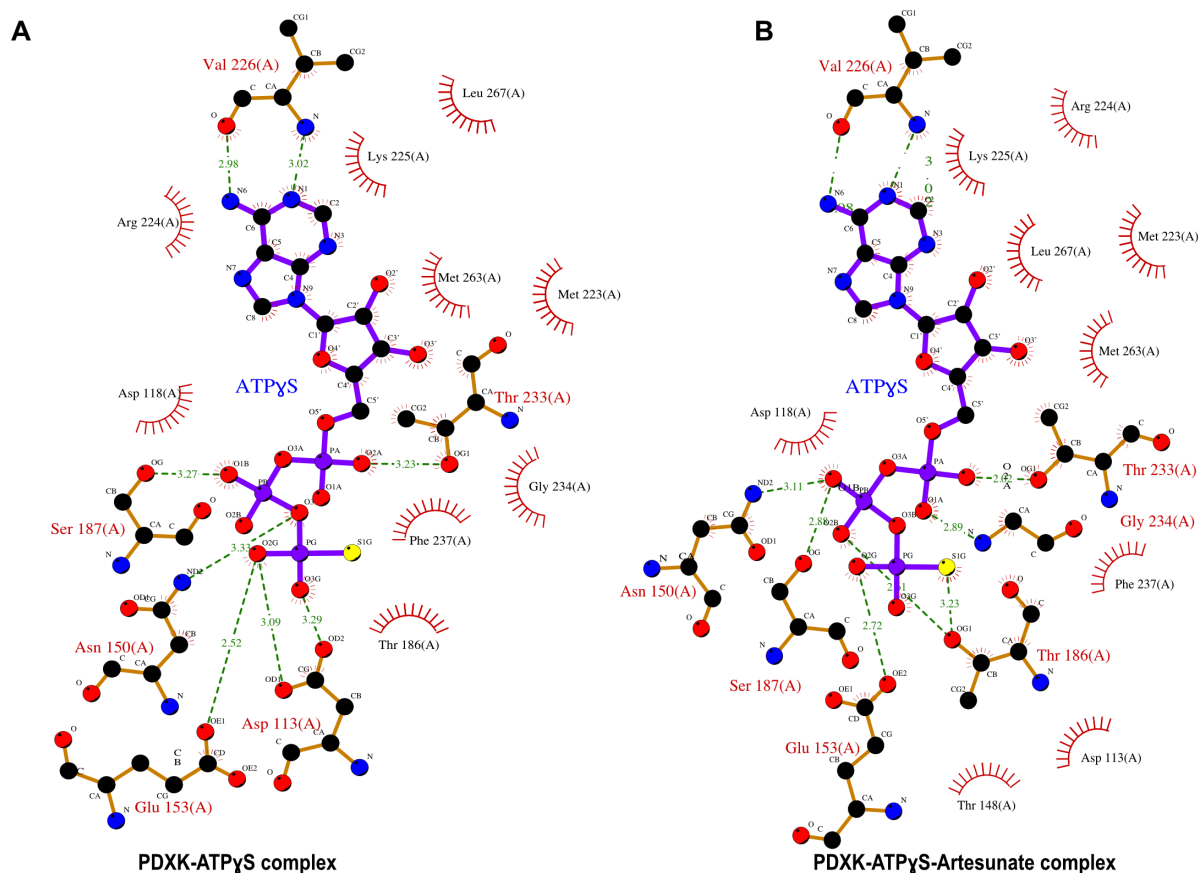

957

958 **Figure 2 – figure supplement 4. Comparison of ATP binding pockets.**

959 **(A-B)** LigPlot 2D-representation of ATP $\gamma$ S from the binary PDXK-ATP $\gamma$ S **(A)** and ternary PDXK-  
 960 ATP $\gamma$ S-artesunate **(B)** complexes derived from an analysis with the ProFunc server (Laskowski et al.,  
 961 2005). Please note that residues mediating the binding of ATP $\gamma$ S are almost identical in both  
 962 structures as is the conformation of the bound ATP $\gamma$ S (not shown).

963

964

965

966

967

968

969

970

**Figure 2 - figure supplement 5**

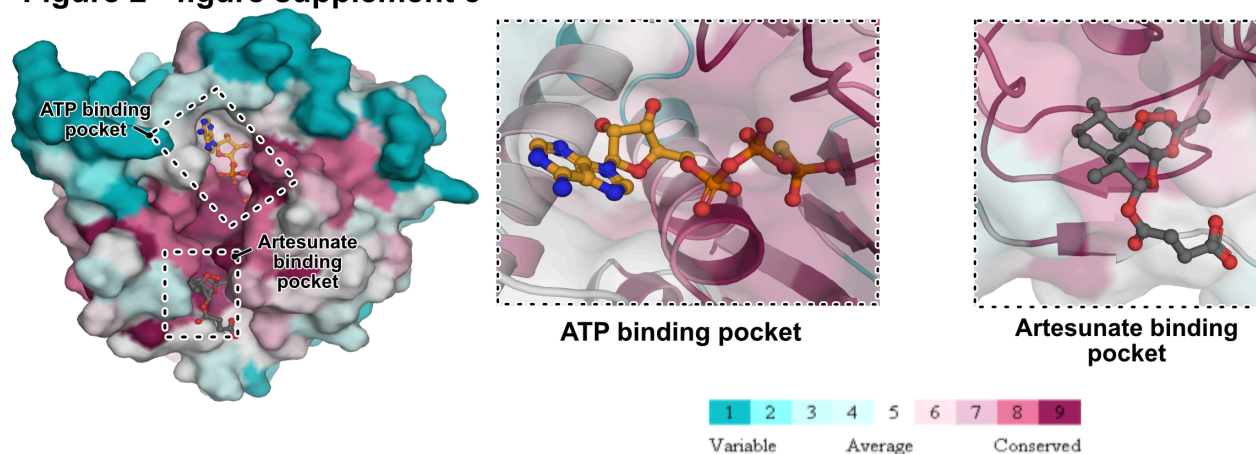

971

972 **Figure 2 – figure supplement 5. Conservation analysis.** PDXK sequence conservation analyzed

973 with the ConSurf server (Ashkenazy et al., 2016). Overall architecture of a PDXK monomer colored

974 according to the accompanying conservation scores. Enlarged views of the ATP and the artesunate

975 binding pockets clearly show that both binding pockets are evolutionarily highly conserved.

976

977

978

979

980

981

982

983

984

985

986

987

988

Figure 3 - figure supplement 1

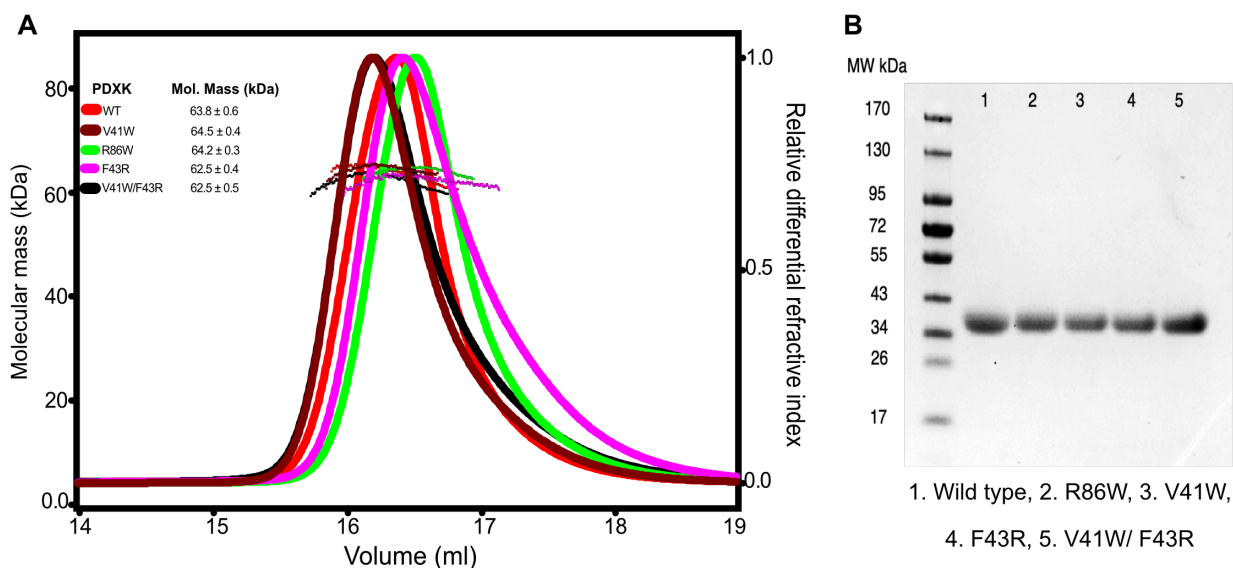

989

990 **Figure 3 – figure supplement 1. Biophysical and biochemical analysis of PDXK variants.**

991 **(A)** SEC-MALS analyses of the wildtype and PDXK mutants. The data confirm that, like the wild-type  
992 protein, all mutants dimerize. Please note that due to non-synchronized injections the elution volumes  
993 of the different samples are slightly offset.

994 **(B)** SDS-PAGE analysis of purified PDXK variants and the wild-type.

995

996

997

998

999

.000

.001

.002

.003

.004

### Figure 3 - figure supplement 2

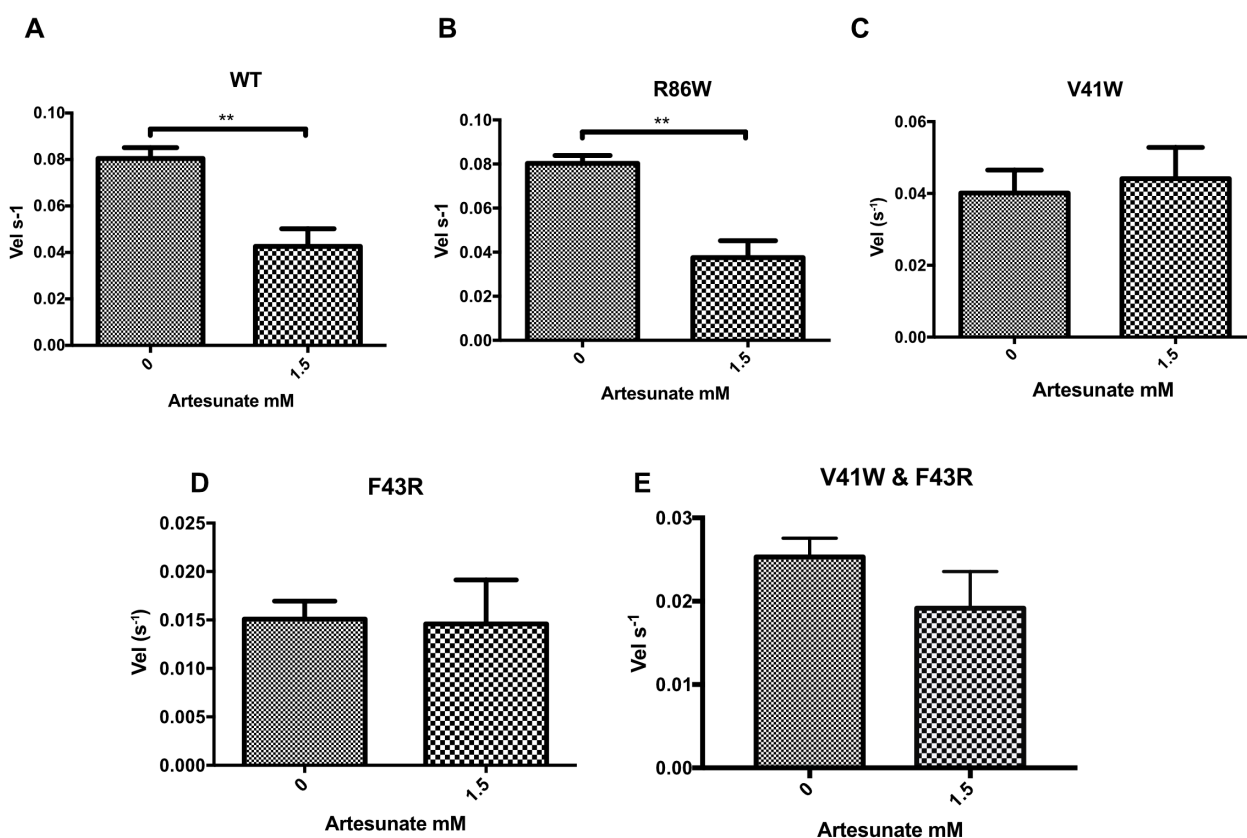

.005

.006

.007 **Figure 3 – figure supplement 2. Inhibition analysis of PDXK variants.**

.008 **(A-E)** Bar diagrams of the turnover rates of PDXK variants in the absence and presence of artesunate

.009 (1.5 mM). Please note that R86W **(B)** behaves similar as the WT **(A)** with artesunate retaining its

.010 inhibition potency whereas the variants V41W **(C)**, F43R **(D)** and the double mutant V41W/F43R **(E)**

.011 completely abolish artesunate binding. Data are presented as mean ± SEM (p values are: \*p<0.05;

.012 \*\*p<0.01; \*\*\*p<0.001; \*\*\*\*p<0.0001, Paired t test).

.013

.014

.015

.016



## Figure 5 - figure supplement 1

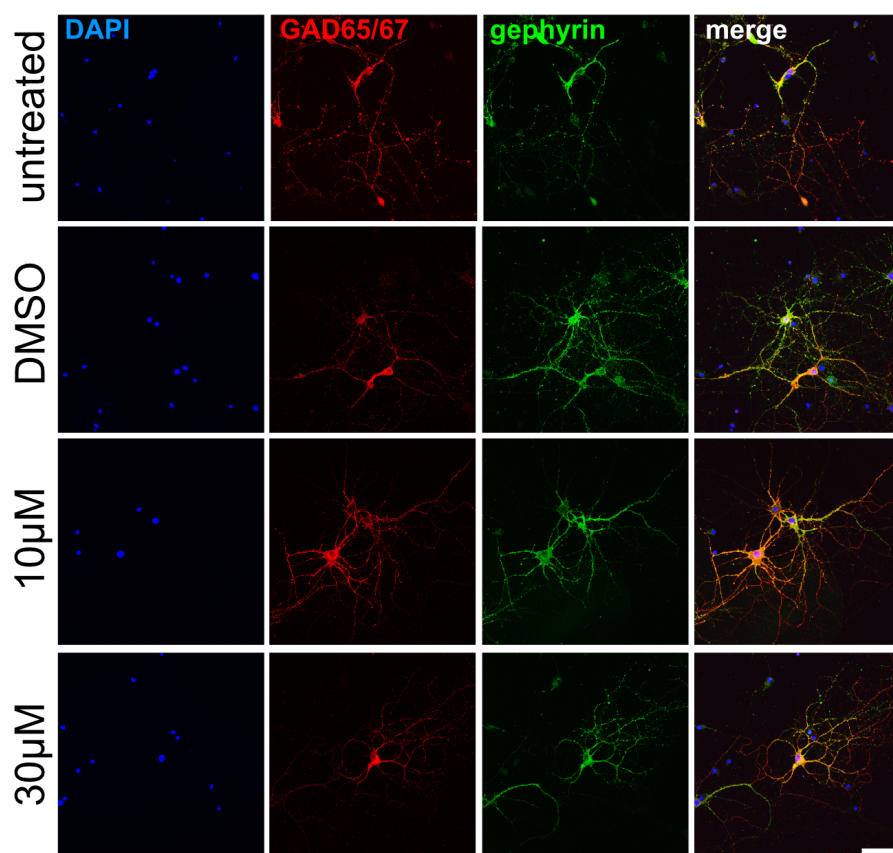

.017

.018 **Figure 5 – figure supplement 1. Immunocytochemical staining of GAD and gephyrin.**

.019 Immunocytochemical staining of hippocampal neurons were performed at DIV14. Untreated cells,  
.020 DMSO treated controls, and artemisinin (10 µM, 30 µM) treated cells are shown. Cells were stained  
.021 for GAD (red), gephyrin (green), and with DAPI (blue) to label the nucleus. The merge of all channels  
.022 is presented in the right panels (yellow overlay of GAD and gephyrin). Scale bar corresponds to 50  
.023 µm.

.024

.025

.026

.027

.028

.029

## Figure 5 - figure supplement 2

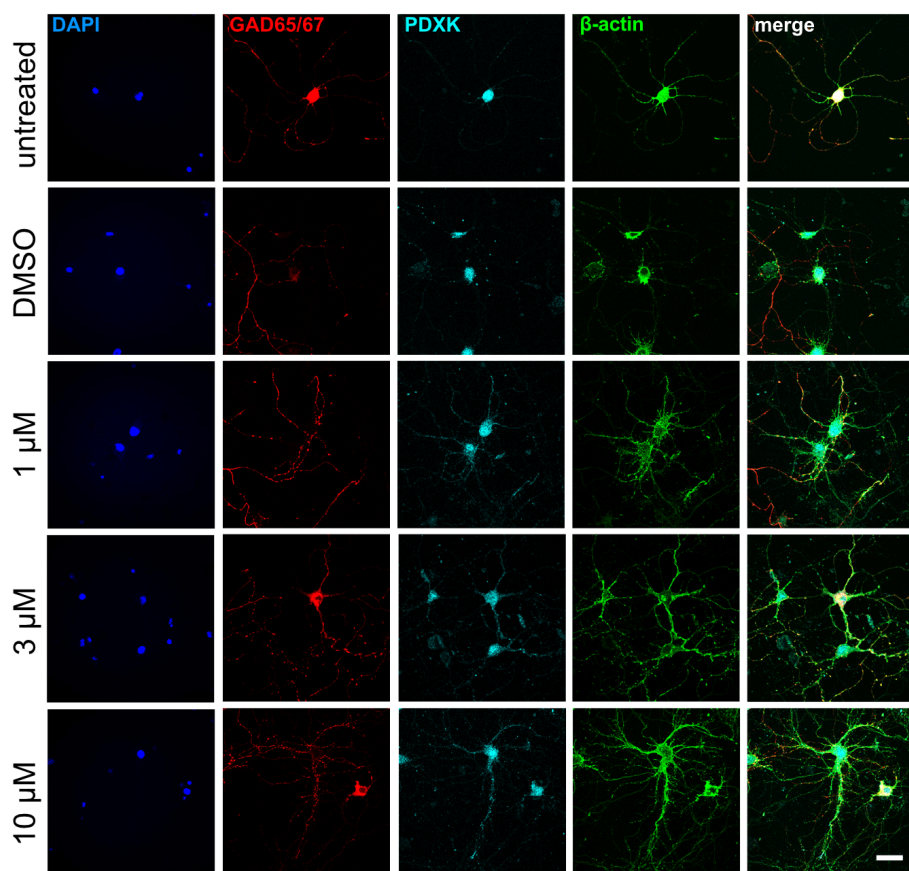

.030

.031 **Figure 5 – figure supplement 2. Immunocytochemical staining of PDXK and GAD.** Hippocampal  
.032 neurons at DIV14 were stained for GAD (red), PDXK (cyan),  $\beta$ -actin (green), and DAPI (blue) to label  
.033 the nucleus. The merge of all channels is presented in the right panels. Untreated cells, DMSO treated  
.034 controls, and artemisinin (1  $\mu$ M, 3  $\mu$ M, 10  $\mu$ M) treated cells are shown. Note, no change in GAD and  
.035 PDXK intensity was observed between the different conditions. Scale bar corresponds to 50  $\mu$ m.

.036

.037

.038

.039

.040

.041

.042

**Figure 5 - figure supplement 3**

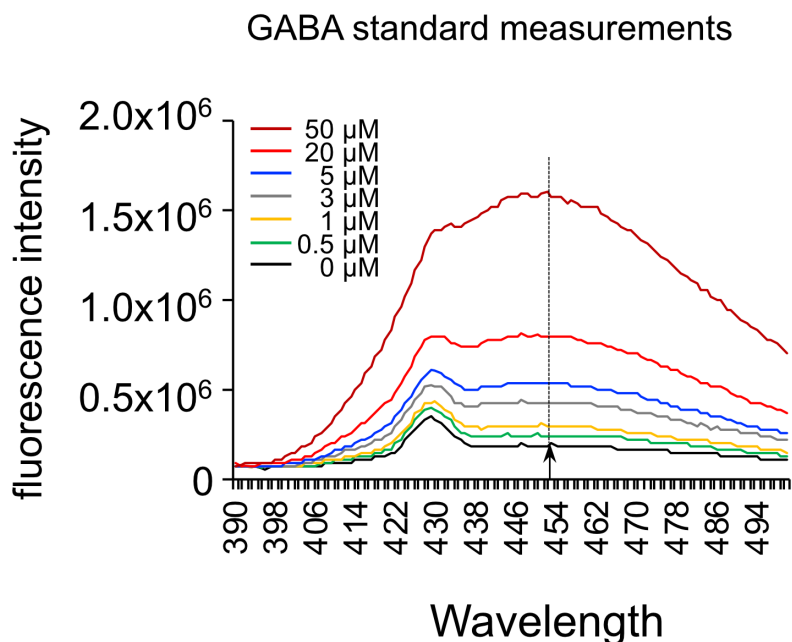

.043

.044 **Figure 5 – figure supplement 3. GABA standard measurements.** A concentration series of  
.045 GABA was established (0, 0.5, 1, 3, 5, 20, 50 μM) by measuring the fluorescence spectrum  
.046 from 390 to 500 nm. GAD activity was quantified based on the emission at 450 nm (marked  
.047 by an arrow and dotted line). These standard values were used to measure the amount of  
.048 GABA synthesized by GAD as represented in **Figure 5D**.

.049
